# Supplementary material for: The Florida Harvester Ant, Pogonomyrmex badius, Relies on Germination to Consume Large Seeds
Source: PLoS One. 2016 Nov 28;11(11):e0166907. doi: 10.1371/journal.pone.0166907 (PMC5125654; doi:10.1371/journal.pone.0166907)
Supplement: S2 Table — (XLSX) [file pone.0166907.s002.xlsx]

## Sheet: Field Germination data 2016, fi
Date of check	Row	Replicate/Hole	Depth	Seed Source	Sieve size	Number germinated	Total seeds	Percent germinated	arcsin % germinated
2015-03-04	1	1	5	2014	12	0	98	0	0
2015-03-04	1	1	5	2014	14	1	81	0.0123457	0.111341
2015-03-04	1	1	5	2014	18	2	65	0.0307692	0.176324
2015-03-04	1	1	5	2014	20	0	27	0	0
2015-03-04	1	1	15	2014	12	6	94	0.0638298	0.255414
2015-03-04	1	1	15	2014	14	65	107	0.607477	0.89372
2015-03-04	1	1	15	2014	18	30	59	0.508475	0.793873
2015-03-04	1	1	15	2014	20	1	25	0.04	0.201358
2015-03-04	1	1	40	2014	12	0	100	0	0
2015-03-04	1	1	40	2014	14	23	105	0.219048	0.487055
2015-03-04	1	1	40	2014	18	19	59	0.322034	0.603442
2015-03-04	1	1	40	2014	20	0	25	0	0
2015-03-04	1	1	80	2014	12	2	100	0.02	0.141897
2015-03-04	1	1	80	2014	14	28	108	0.259259	0.534226
2015-03-04	1	1	80	2014	18	7	44	0.159091	0.410276
2015-03-04	1	1	80	2014	20	0	25	0	0
2015-03-04	1	2	5	2014	12	9	107	0.0841121	0.294249
2015-03-04	1	2	5	2014	14	77	110	0.7	0.991157
2015-03-04	1	2	5	2014	18	21	51	0.411765	0.696698
2015-03-04	1	2	5	2014	20	0	27	0	0
2015-03-04	1	2	15	2014	12	2	104	0.0192308	0.139123
2015-03-04	1	2	15	2014	14	73	103	0.708738	1.00073
2015-03-04	1	2	15	2014	18	19	65	0.292308	0.571215
2015-03-04	1	2	15	2014	20	0	28	0	0
2015-03-04	1	2	40	2014	12	0	96	0	0
2015-03-04	1	2	40	2014	14	31	108	0.287037	0.565406
2015-03-04	1	2	40	2014	18	6	50	0.12	0.353742
2015-03-04	1	2	40	2014	20	0	29	0	0
2015-03-04	1	2	80	2014	12	0	113	0	0
2015-03-04	1	2	80	2014	14	20	100	0.19802	0.461168
2015-03-04	1	2	80	2014	18	13	51	0.254902	0.529241
2015-03-04	1	2	80	2014	20	0	26	0	0
2015-03-04	1	3	5	2014	12	29	103	0.281553	0.559327
2015-03-04	1	3	5	2014	14	93	110	0.845455	1.16677
2015-03-04	1	3	5	2014	18	26	61	0.42623	0.711357
2015-03-04	1	3	5	2014	20	1	23	0.0434783	0.210056
2015-03-04	1	3	15	2014	12	6	85	0.0705882	0.268914
2015-03-04	1	3	15	2014	14	59	104	0.567308	0.852911
2015-03-04	1	3	15	2014	18	18	50	0.36	0.643501
2015-03-04	1	3	15	2014	20	0	24	0	0
2015-03-04	1	3	40	2014	12	17	92	0.184783	0.444342
2015-03-04	1	3	40	2014	14	25	108	0.231481	0.501938
2015-03-04	1	3	40	2014	18	10	55	0.181818	0.440511
2015-03-04	1	3	40	2014	20	0	30	0	0
2015-03-04	1	3	80	2014	12	16	95	0.168421	0.422883
2015-03-04	1	3	80	2014	14	32	105	0.304762	0.584824
2015-03-04	1	3	80	2014	18	14	61	0.229508	0.499595
2015-03-04	1	3	80	2014	20	0	26	0	0
2015-03-04	1	4	5	2014	12	7	78	0.0897436	0.304244
2015-03-04	1	4	5	2014	14	4	88	0.0454545	0.21485
2015-03-04	1	4	5	2014	18	0	32	0	0
2015-03-04	1	4	5	2014	20	1	22	0.0454545	0.21485
2015-03-04	1	4	15	2014	12	2	98	0.0204082	0.143348
2015-03-04	1	4	15	2014	14	63	113	0.557522	0.843048
2015-03-04	1	4	15	2014	18	23	54	0.425926	0.71105
2015-03-04	1	4	15	2014	20	0	26	0	0
2015-03-04	1	4	40	2014	12	3	107	0.0280374	0.168236
2015-03-04	1	4	40	2014	14	42	106	0.396226	0.680865
2015-03-04	1	4	40	2014	18	14	60	0.233333	0.50413
2015-03-04	1	4	40	2014	20	0	31	0	0
2015-03-04	1	4	80	2014	12	0	100	0	0
2015-03-04	1	4	80	2014	14	35	108	0.324074	0.605624
2015-03-04	1	4	80	2014	18	11	49	0.22449	0.493605
2015-03-04	1	4	80	2014	20	0	31	0	0
2015-03-04	1	5	5	2014	12	5	74	0.0675676	0.262958
2015-03-04	1	5	5	2014	14	67	103	0.650485	0.938253
2015-03-04	1	5	5	2014	18	34	57	0.596491	0.882499
2015-03-04	1	5	5	2014	20	0	25	0	0
2015-03-04	1	5	15	2014	12	6	91	0.0659341	0.259685
2015-03-04	1	5	15	2014	14	49	102	0.480392	0.765785
2015-03-04	1	5	15	2014	18	21	61	0.344262	0.627026
2015-03-04	1	5	15	2014	20	0	29	0	0
2015-03-04	1	5	40	2014	12	1	79	0.0126582	0.112748
2015-03-04	1	5	40	2014	14	29	111	0.261261	0.536507
2015-03-04	1	5	40	2014	18	13	53	0.245283	0.518135
2015-03-04	1	5	40	2014	20	0	25	0	0
2015-03-04	1	5	80	2014	12	4	81	0.0493827	0.224093
2015-03-04	1	5	80	2014	14	47	105	0.447619	0.732921
2015-03-04	1	5	80	2014	18	19	56	0.339286	0.621779
2015-03-04	1	5	80	2014	20	0	27	0	0
2015-04-30	1	1	5	2014	12	20	77	0.25974	0.534775
2015-04-30	1	1	5	2014	14	63	81	0.777778	1.07991
2015-04-30	1	1	5	2014	18	35	58	0.603448	0.889599
2015-04-30	1	1	5	2014	20	0	24	0	0
2015-04-30	1	1	15	2014	12	18	65	0.276923	0.554167
2015-04-30	1	1	15	2014	14	86	106	0.811321	1.12146
2015-04-30	1	1	15	2014	18	25	46	0.543478	0.828931
2015-04-30	1	1	15	2014	20	0	29	0	0
2015-04-30	1	1	40	2014	12	10	54	0.185185	0.44486
2015-04-30	1	1	40	2014	14	68	93	0.731183	1.02573
2015-04-30	1	1	40	2014	18	19	67	0.283582	0.56158
2015-04-30	1	1	40	2014	20	0	25	0	0
2015-04-30	1	1	80	2014	12	12	77	0.155844	0.405819
2015-04-30	1	1	80	2014	14	77	102	0.754902	1.05288
2015-04-30	1	1	80	2014	18	35	82	0.426829	0.711964
2015-04-30	1	1	80	2014	20	2	26	0.0769231	0.281035
2015-04-30	1	2	5	2014	12	21	67	0.313433	0.594206
2015-04-30	1	2	5	2014	14	73	95	0.768421	1.06874
2015-04-30	1	2	5	2014	18	30	46	0.652174	0.940025
2015-04-30	1	2	5	2014	20	0	32	0	0
2015-04-30	1	2	15	2014	12	16	75	0.213333	0.480114
2015-04-30	1	2	15	2014	14	80	106	0.754717	1.05266
2015-04-30	1	2	15	2014	18	23	61	0.377049	0.661173
2015-04-30	1	2	15	2014	20	0	23	0	0
2015-04-30	1	2	40	2014	12	12	70	0.171429	0.426887
2015-04-30	1	2	40	2014	14	83	105	0.790476	1.09535
2015-04-30	1	2	40	2014	18	29	63	0.460317	0.745674
2015-04-30	1	2	40	2014	20	0	25	0	0
2015-04-30	1	2	80	2014	12	14	69	0.202899	0.467261
2015-04-30	1	2	80	2014	14	55	92	0.597826	0.883859
2015-04-30	1	2	80	2014	18	39	63	0.619048	0.9056
2015-04-30	1	2	80	2014	20	0	29	0	0
2015-04-30	1	3	5	2014	12	23	67	0.343284	0.625995
2015-04-30	1	3	5	2014	14	58	81	0.716049	1.00881
2015-04-30	1	3	5	2014	18	42	57	0.736842	1.03213
2015-04-30	1	3	5	2014	20	0	27	0	0
2015-04-30	1	3	15	2014	12	10	77	0.12987	0.36867
2015-04-30	1	3	15	2014	14	77	106	0.726415	1.02037
2015-04-30	1	3	15	2014	18	24	38	0.631579	0.918545
2015-04-30	1	3	15	2014	20	0	26	0	0
2015-04-30	1	3	40	2014	12	16	74	0.216216	0.483624
2015-04-30	1	3	40	2014	14	71	94	0.755319	1.05336
2015-04-30	1	3	40	2014	18	33	58	0.568966	0.854584
2015-04-30	1	3	40	2014	20	0	29	0	0
2015-04-30	1	3	80	2014	12	35	126	0.277778	0.555121
2015-04-30	1	3	80	2014	14	71	98	0.72449	1.01821
2015-04-30	1	3	80	2014	18	30	50	0.6	0.886077
2015-04-30	1	3	80	2014	20	2	27	0.0740741	0.275643
2015-04-30	1	4	5	2014	12	15	63	0.238095	0.50974
2015-04-30	1	4	5	2014	14	56	89	0.629213	0.916095
2015-04-30	1	4	5	2014	18	24	53	0.45283	0.738158
2015-04-30	1	4	5	2014	20	1	25	0.04	0.201358
2015-04-30	1	4	15	2014	12	15	58	0.258621	0.533497
2015-04-30	1	4	15	2014	14	42	52	0.807692	1.11684
2015-04-30	1	4	15	2014	18	61	73	0.835616	1.15333
2015-04-30	1	4	15	2014	20	0	12	0	0
2015-04-30	1	4	40	2014	12	10	66	0.151515	0.399817
2015-04-30	1	4	40	2014	14	68	84	0.809524	1.11916
2015-04-30	1	4	40	2014	18	24	54	0.444444	0.729728
2015-04-30	1	4	40	2014	20	0	24	0	0
2015-04-30	1	4	80	2014	12	18	52	0.346154	0.629015
2015-04-30	1	4	80	2014	14	53	93	0.569892	0.85552
2015-04-30	1	4	80	2014	18	25	59	0.423729	0.708828
2015-04-30	1	4	80	2014	20	3	29	0.103448	0.327454
2015-04-30	1	5	5	2014	12	17	56	0.288136	0.566619
2015-04-30	1	5	5	2014	14	83	105	0.790476	1.09535
2015-04-30	1	5	5	2014	18	37	64	0.578125	0.863845
2015-04-30	1	5	5	2014	20	0	28	0	0
2015-04-30	1	5	15	2014	12	26	72	0.361111	0.644658
2015-04-30	1	5	15	2014	14	66	88	0.75	1.0472
2015-04-30	1	5	15	2014	18	33	53	0.622642	0.909304
2015-04-30	1	5	15	2014	20	0	26	0	0
2015-04-30	1	5	40	2014	12	37	108	0.342593	0.625267
2015-04-30	1	5	40	2014	14	65	97	0.670103	0.958966
2015-04-30	1	5	40	2014	18	31	51	0.607843	0.894095
2015-04-30	1	5	40	2014	20	1	26	0.0384615	0.197396
2015-04-30	1	5	80	2014	12	41	111	0.369369	0.653234
2015-04-30	1	5	80	2014	14	56	98	0.571429	0.857072
2015-04-30	1	5	80	2014	18	20	50	0.4	0.684719
2015-04-30	1	5	80	2014	20	0	20	0	0
2015-06-29	1	1	5	2014	12	27	97	0.278351	0.55576
2015-06-29	1	1	5	2014	14	15	103	0.145631	0.391544
2015-06-29	1	1	5	2014	18	10	68	0.147059	0.393564
2015-06-29	1	1	5	2014	20	1	24	0.0416667	0.205569
2015-06-29	1	1	15	2014	12	20	90	0.222222	0.490883
2015-06-29	1	1	15	2014	14	34	117	0.290598	0.569335
2015-06-29	1	1	15	2014	18	18	73	0.246575	0.519635
2015-06-29	1	1	15	2014	20	0	25	0	0
2015-06-29	1	1	40	2014	12	16	60	0.266667	0.542639
2015-06-29	1	1	40	2014	14	36	110	0.327273	0.609037
2015-06-29	1	1	40	2014	18	23	72	0.319444	0.600669
2015-06-29	1	1	40	2014	20	1	24	0.0416667	0.205569
2015-06-29	1	1	80	2014	12	27	90	0.3	0.57964
2015-06-29	1	1	80	2014	14	33	118	0.279661	0.557221
2015-06-29	1	1	80	2014	18	43	84	0.511905	0.797304
2015-06-29	1	1	80	2014	20	1	26	0.0384615	0.197396
2015-06-29	1	2	5	2014	12	31	110	0.281818	0.559622
2015-06-29	1	2	5	2014	14	12	85	0.141176	0.385189
2015-06-29	1	2	5	2014	18	19	82	0.231707	0.502205
2015-06-29	1	2	5	2014	20	1	24	0.0416667	0.205569
2015-06-29	1	2	15	2014	12	26	102	0.254902	0.529241
2015-06-29	1	2	15	2014	14	25	108	0.231481	0.501938
2015-06-29	1	2	15	2014	18	17	57	0.298246	0.577724
2015-06-29	1	2	15	2014	20	0	24	0	0
2015-06-29	1	2	40	2014	12	20	68	0.294118	0.573203
2015-06-29	1	2	40	2014	14	34	96	0.354167	0.637414
2015-06-29	1	2	40	2014	18	19	56	0.339286	0.621779
2015-06-29	1	2	40	2014	20	0	24	0	0
2015-06-29	1	2	80	2014	12	21	109	0.192661	0.454409
2015-06-29	1	2	80	2014	14	44	108	0.407407	0.692268
2015-06-29	1	2	80	2014	18	33	69	0.478261	0.763652
2015-06-29	1	2	80	2014	20	1	25	0.04	0.201358
2015-06-29	1	3	5	2014	12	26	102	0.254902	0.529241
2015-06-29	1	3	5	2014	14	22	126	0.174603	0.431084
2015-06-29	1	3	5	2014	18	8	49	0.163265	0.415952
2015-06-29	1	3	5	2014	20	2	23	0.0869565	0.299334
2015-06-29	1	3	15	2014	12	29	104	0.278846	0.556313
2015-06-29	1	3	15	2014	14	39	110	0.354545	0.63781
2015-06-29	1	3	15	2014	18	21	51	0.411765	0.696698
2015-06-29	1	3	15	2014	20	0	23	0	0
2015-06-29	1	3	40	2014	12	22	87	0.252874	0.526911
2015-06-29	1	3	40	2014	14	63	122	0.516393	0.801795
2015-06-29	1	3	40	2014	18	16	56	0.285714	0.563943
2015-06-29	1	3	40	2014	20	1	25	0.04	0.201358
2015-06-29	1	3	80	2014	12	21	80	0.2625	0.537916
2015-06-29	1	3	80	2014	14	52	107	0.485981	0.771378
2015-06-29	1	3	80	2014	18	27	59	0.457627	0.742974
2015-06-29	1	3	80	2014	20	0	26	0	0
2015-06-29	1	4	5	2014	12	23	93	0.247312	0.520489
2015-06-29	1	4	5	2014	14	13	97	0.134021	0.374802
2015-06-29	1	4	5	2014	18	10	46	0.217391	0.48505
2015-06-29	1	4	5	2014	20	3	25	0.12	0.353742
2015-06-29	1	4	15	2014	12	28	102	0.27451	0.551466
2015-06-29	1	4	15	2014	14	29	84	0.345238	0.628052
2015-06-29	1	4	15	2014	18	14	65	0.215385	0.482613
2015-06-29	1	4	15	2014	20	1	22	0.0454545	0.21485
2015-06-29	1	4	40	2014	12	30	96	0.3125	0.5932
2015-06-29	1	4	40	2014	14	59	110	0.536364	0.821794
2015-06-29	1	4	40	2014	18	32	60	0.533333	0.818756
2015-06-29	1	4	40	2014	20	2	25	0.08	0.286757
2015-06-29	1	4	80	2014	12	28	96	0.291667	0.57051
2015-06-29	1	4	80	2014	14	45	95	0.473684	0.75907
2015-06-29	1	4	80	2014	18	42	74	0.567568	0.853173
2015-06-29	1	4	80	2014	20	1	25	0.04	0.201358
2015-06-29	1	5	5	2014	12	32	102	0.313725	0.594521
2015-06-29	1	5	5	2014	14	19	120	0.158333	0.409239
2015-06-29	1	5	5	2014	18	11	48	0.229167	0.499189
2015-06-29	1	5	5	2014	20	2	23	0.0869565	0.299334
2015-06-29	1	5	15	2014	12	29	90	0.322222	0.603644
2015-06-29	1	5	15	2014	14	44	116	0.37931	0.663505
2015-06-29	1	5	15	2014	18	34	80	0.425	0.710114
2015-06-29	1	5	15	2014	20	0	26	0	0
2015-06-29	1	5	40	2014	12	28	86	0.325581	0.607233
2015-06-29	1	5	40	2014	14	42	102	0.411765	0.696698
2015-06-29	1	5	40	2014	18	36	71	0.507042	0.792441
2015-06-29	1	5	40	2014	20	1	23	0.0434783	0.210056
2015-06-29	1	5	80	2014	12	15	83	0.180723	0.439089
2015-06-29	1	5	80	2014	14	60	122	0.491803	0.777201
2015-06-29	1	5	80	2014	18	25	54	0.462963	0.748327
2015-06-29	1	5	80	2014	20	0	26	0	0
2015-08-31	1	1	5	2014	12	26	69	0.376812	0.660928
2015-08-31	1	1	5	2014	14	2	98	0.0204082	0.143348
2015-08-31	1	1	5	2014	18	6	61	0.0983607	0.319008
2015-08-31	1	1	5	2014	20	2	25	0.08	0.286757
2015-08-31	1	1	15	2014	12	25	85	0.294118	0.573203
2015-08-31	1	1	15	2014	14	3	123	0.0243902	0.156816
2015-08-31	1	1	15	2014	18	6	61	0.0983607	0.319008
2015-08-31	1	1	15	2014	20	2	25	0.08	0.286757
2015-08-31	1	1	40	2014	12	26	95	0.273684	0.550541
2015-08-31	1	1	40	2014	14	3	111	0.027027	0.165149
2015-08-31	1	1	40	2014	18	4	64	0.0625	0.25268
2015-08-31	1	1	40	2014	20	0	24	0	0
2015-08-31	1	1	80	2014	12	24	87	0.275862	0.55298
2015-08-31	1	1	80	2014	14	4	102	0.0392157	0.199347
2015-08-31	1	1	80	2014	18	5	70	0.0714286	0.27055
2015-08-31	1	1	80	2014	20	0	27	0	0
2015-08-31	1	2	5	2014	12	23	73	0.315068	0.595967
2015-08-31	1	2	5	2014	14	3	89	0.0337079	0.184644
2015-08-31	1	2	5	2014	18	7	51	0.137255	0.379525
2015-08-31	1	2	5	2014	20	1	23	0.0434783	0.210056
2015-08-31	1	2	15	2014	12	34	92	0.369565	0.653437
2015-08-31	1	2	15	2014	14	5	111	0.045045	0.213865
2015-08-31	1	2	15	2014	18	12	81	0.148148	0.3951
2015-08-31	1	2	15	2014	20	1	24	0.0416667	0.205569
2015-08-31	1	2	40	2014	12	19	87	0.218391	0.48626
2015-08-31	1	2	40	2014	14	1	84	0.0119048	0.109327
2015-08-31	1	2	40	2014	18	6	78	0.0769231	0.281035
2015-08-31	1	2	40	2014	20	2	25	0.08	0.286757
2015-08-31	1	2	80	2014	12	28	87	0.321839	0.603234
2015-08-31	1	2	80	2014	14	6	100	0.06	0.247467
2015-08-31	1	2	80	2014	18	8	54	0.148148	0.3951
2015-08-31	1	2	80	2014	20	4	26	0.153846	0.403057
2015-08-31	1	3	5	2014	12	27	89	0.303371	0.583312
2015-08-31	1	3	5	2014	14	4	148	0.027027	0.165149
2015-08-31	1	3	5	2014	18	7	69	0.101449	0.324158
2015-08-31	1	3	5	2014	20	2	25	0.08	0.286757
2015-08-31	1	3	15	2014	12	24	92	0.26087	0.536061
2015-08-31	1	3	15	2014	14	2	108	0.0185185	0.136506
2015-08-31	1	3	15	2014	18	6	59	0.101695	0.324565
2015-08-31	1	3	15	2014	20	2	24	0.0833333	0.292843
2015-08-31	1	3	40	2014	12	21	86	0.244186	0.516859
2015-08-31	1	3	40	2014	14	6	102	0.0588235	0.244979
2015-08-31	1	3	40	2014	18	3	50	0.06	0.247467
2015-08-31	1	3	40	2014	20	1	28	0.0357143	0.190126
2015-08-31	1	3	80	2014	12	37	100	0.366337	0.650089
2015-08-31	1	3	80	2014	14	7	111	0.0630631	0.253841
2015-08-31	1	3	80	2014	18	8	61	0.131148	0.370566
2015-08-31	1	3	80	2014	20	1	27	0.037037	0.193658
2015-08-31	1	4	5	2014	12	24	86	0.27907	0.556562
2015-08-31	1	4	5	2014	14	5	102	0.0490196	0.223254
2015-08-31	1	4	5	2014	18	9	59	0.152542	0.401247
2015-08-31	1	4	5	2014	20	2	23	0.0869565	0.299334
2015-08-31	1	4	15	2014	12	20	73	0.273973	0.550864
2015-08-31	1	4	15	2014	14	6	94	0.0638298	0.255414
2015-08-31	1	4	15	2014	18	12	68	0.176471	0.433538
2015-08-31	1	4	15	2014	20	0	27	0	0
2015-08-31	1	4	40	2014	12	21	66	0.318182	0.599314
2015-08-31	1	4	40	2014	14	7	80	0.0875	0.300297
2015-08-31	1	4	40	2014	18	7	66	0.106061	0.33172
2015-08-31	1	4	40	2014	20	1	23	0.0434783	0.210056
2015-08-31	1	4	80	2014	12	22	96	0.229167	0.499189
2015-08-31	1	4	80	2014	14	8	113	0.0707965	0.26932
2015-08-31	1	4	80	2014	18	7	73	0.0958904	0.314837
2015-08-31	1	4	80	2014	20	4	28	0.142857	0.387597
2015-08-31	1	5	5	2014	12	22	74	0.297297	0.576687
2015-08-31	1	5	5	2014	14	1	108	0.00925926	0.0963742
2015-08-31	1	5	5	2014	18	4	61	0.0655738	0.258958
2015-08-31	1	5	5	2014	20	1	26	0.0384615	0.197396
2015-08-31	1	5	15	2014	12	33	76	0.434211	0.719417
2015-08-31	1	5	15	2014	14	2	108	0.0185185	0.136506
2015-08-31	1	5	15	2014	18	7	68	0.102941	0.326621
2015-08-31	1	5	15	2014	20	0	24	0	0
2015-08-31	1	5	40	2014	12	29	95	0.305263	0.585368
2015-08-31	1	5	40	2014	14	3	108	0.0277778	0.167448
2015-08-31	1	5	40	2014	18	5	64	0.078125	0.283282
2015-08-31	1	5	40	2014	20	2	27	0.0740741	0.275643
2015-08-31	1	5	80	2014	12	28	93	0.301075	0.580812
2015-08-31	1	5	80	2014	14	5	105	0.047619	0.219988
2015-08-31	1	5	80	2014	18	18	63	0.285714	0.563943
2015-08-31	1	5	80	2014	20	7	26	0.269231	0.545534
2015-11-02	1	1	5	2014	12	18	50	0.36	0.643501
2015-11-02	1	1	5	2014	14	11	62	0.177419	0.434781
2015-11-02	1	1	5	2014	18	24	74	0.324324	0.605891
2015-11-02	1	1	5	2014	20	2	26	0.0769231	0.281035
2015-11-02	1	1	15	2015	12	2	111	0.018018	0.134638
2015-11-02	1	1	15	2015	14	0	105	0	0
2015-11-02	1	1	15	2015	18	1	59	0.0169492	0.13056
2015-11-02	1	1	15	2015	20	2	25	0.08	0.286757
2015-11-02	1	1	40	2015	12	0	84	0	0
2015-11-02	1	1	40	2015	14	2	89	0.0224719	0.150474
2015-11-02	1	1	40	2015	18	1	62	0.016129	0.127344
2015-11-02	1	1	40	2015	20	1	24	0.0416667	0.205569
2015-11-02	1	1	80	2015	12	1	88	0.0113636	0.106803
2015-11-02	1	1	80	2015	14	0	99	0	0
2015-11-02	1	1	80	2015	18	1	39	0.025641	0.16082
2015-11-02	1	1	80	2015	20	0	26	0	0
2015-11-02	1	2	5	2015	12	1	100	0.01	0.100167
2015-11-02	1	2	5	2015	14	0	95	0	0
2015-11-02	1	2	5	2015	18	2	41	0.0487805	0.222699
2015-11-02	1	2	5	2015	20	3	26	0.115385	0.34658
2015-11-02	1	2	15	2015	12	0	90	0	0
2015-11-02	1	2	15	2015	14	1	112	0.00892857	0.0946323
2015-11-02	1	2	15	2015	18	4	85	0.0470588	0.218669
2015-11-02	1	2	15	2015	20	0	25	0	0
2015-11-02	1	2	40	2014	12	16	70	0.228571	0.49848
2015-11-02	1	2	40	2014	14	52	112	0.464286	0.749653
2015-11-02	1	2	40	2014	18	27	56	0.482143	0.767537
2015-11-02	1	2	40	2014	20	9	27	0.333333	0.61548
2015-11-02	1	2	80	2014	12	14	66	0.212121	0.478633
2015-11-02	1	2	80	2014	14	38	114	0.333333	0.61548
2015-11-02	1	2	80	2014	18	28	68	0.411765	0.696698
2015-11-02	1	2	80	2014	20	6	23	0.26087	0.536061
2015-11-02	1	3	5	2014	12	26	100	0.26	0.535071
2015-11-02	1	3	5	2014	14	44	94	0.468085	0.753462
2015-11-02	1	3	5	2014	18	43	78	0.551282	0.836771
2015-11-02	1	3	5	2014	20	3	25	0.12	0.353742
2015-11-02	1	3	15	2015	12	2	71	0.028169	0.168634
2015-11-02	1	3	15	2015	14	1	102	0.00980392	0.0991773
2015-11-02	1	3	15	2015	18	0	51	0	0
2015-11-02	1	3	15	2015	20	0	26	0	0
2015-11-02	1	3	40	2015	12	1	87	0.0114943	0.107418
2015-11-02	1	3	40	2015	14	0	103	0	0
2015-11-02	1	3	40	2015	18	3	58	0.0517241	0.229437
2015-11-02	1	3	40	2015	20	0	25	0	0
2015-11-02	1	3	80	2015	12	0	82	0	0
2015-11-02	1	3	80	2015	14	0	98	0	0
2015-11-02	1	3	80	2015	18	0	59	0	0
2015-11-02	1	3	80	2015	20	0	24	0	0
2015-11-02	1	4	5	2014	12	21	65	0.323077	0.604558
2015-11-02	1	4	5	2014	14	39	112	0.348214	0.631179
2015-11-02	1	4	5	2014	18	31	65	0.476923	0.762313
2015-11-02	1	4	5	2014	20	8	27	0.296296	0.575591
2015-11-02	1	4	15	2015	12	1	88	0.0113636	0.106803
2015-11-02	1	4	15	2015	14	0	104	0	0
2015-11-02	1	4	15	2015	18	2	47	0.0425532	0.207776
2015-11-02	1	4	15	2015	20	1	24	0.0416667	0.205569
2015-11-02	1	4	40	2015	12	0	87	0	0
2015-11-02	1	4	40	2015	14	0	100	0	0
2015-11-02	1	4	40	2015	18	1	58	0.0172414	0.131687
2015-11-02	1	4	40	2015	20	0	25	0	0
2015-11-02	1	4	80	2015	12	3	93	0.0322581	0.180585
2015-11-02	1	4	80	2015	14	1	113	0.00884956	0.0942114
2015-11-02	1	4	80	2015	18	1	79	0.0126582	0.112748
2015-11-02	1	4	80	2015	20	1	24	0.0416667	0.205569
2015-11-02	1	5	5	2014	12	17	52	0.326923	0.608664
2015-11-02	1	5	5	2014	14	44	115	0.382609	0.666901
2015-11-02	1	5	5	2014	18	28	76	0.368421	0.652251
2015-11-02	1	5	5	2014	20	5	26	0.192308	0.453961
2015-11-02	1	5	15	2014	12	23	98	0.234694	0.505737
2015-11-02	1	5	15	2014	14	37	96	0.385417	0.669787
2015-11-02	1	5	15	2014	18	25	62	0.403226	0.688009
2015-11-02	1	5	15	2014	20	4	25	0.16	0.411517
2015-11-02	1	5	40	2014	12	15	74	0.202703	0.467017
2015-11-02	1	5	40	2014	14	40	87	0.45977	0.745125
2015-11-02	1	5	40	2014	18	43	77	0.558442	0.843974
2015-11-02	1	5	40	2014	20	1	24	0.0416667	0.205569
2015-11-02	1	5	80	2014	12	15	63	0.238095	0.50974
2015-11-02	1	5	80	2014	14	34	108	0.314815	0.595694
2015-11-02	1	5	80	2014	18	34	68	0.5	0.785398
2015-11-02	1	5	80	2014	20	9	24	0.375	0.659058
2015-11-02	2	1	5	2015	12	2	82	0.0243902	0.156816
2015-11-02	2	1	5	2015	14	0	108	0	0
2015-11-02	2	1	5	2015	18	1	48	0.0208333	0.144843
2015-11-02	2	1	5	2015	20	1	24	0.0416667	0.205569
2015-11-02	2	1	15	2014	12	20	64	0.3125	0.5932
2015-11-02	2	1	15	2014	14	57	106	0.537736	0.82317
2015-11-02	2	1	15	2014	18	34	73	0.465753	0.751125
2015-11-02	2	1	15	2014	20	5	24	0.208333	0.473985
2015-11-02	2	1	40	2014	12	22	54	0.407407	0.692268
2015-11-02	2	1	40	2014	14	22	91	0.241758	0.514029
2015-11-02	2	1	40	2014	18	28	56	0.5	0.785398
2015-11-02	2	1	40	2014	20	4	21	0.190476	0.451633
2015-11-02	2	1	80	2014	12	25	68	0.367647	0.651449
2015-11-02	2	1	80	2014	14	38	107	0.35514	0.638431
2015-11-02	2	1	80	2014	18	25	67	0.373134	0.65713
2015-11-02	2	1	80	2014	20	8	26	0.307692	0.588003
2015-11-02	2	2	5	2015	12	0	89	0	0
2015-11-02	2	2	5	2015	14	0	82	0	0
2015-11-02	2	2	5	2015	18	1	69	0.0144928	0.120679
2015-11-02	2	2	5	2015	20	2	27	0.0740741	0.275643
2015-11-02	2	2	15	2014	12	24	73	0.328767	0.610628
2015-11-02	2	2	15	2014	14	43	93	0.462366	0.747728
2015-11-02	2	2	15	2014	18	26	61	0.42623	0.711357
2015-11-02	2	2	15	2014	20	6	22	0.272727	0.549467
2015-11-02	2	2	40	2015	12	0	118	0	0
2015-11-02	2	2	40	2015	14	0	100	0	0
2015-11-02	2	2	40	2015	18	0	36	0	0
2015-11-02	2	2	40	2015	20	0	24	0	0
2015-11-02	2	2	80	2015	12	0	93	0	0
2015-11-02	2	2	80	2015	14	0	97	0	0
2015-11-02	2	2	80	2015	18	0	63	0	0
2015-11-02	2	2	80	2015	20	1	25	0.04	0.201358
2015-11-02	2	3	5	2014	12	20	66	0.30303	0.582941
2015-11-02	2	3	5	2014	14	39	102	0.382353	0.666638
2015-11-02	2	3	5	2014	18
2015-11-02	2	3	5	2014	20	6	26	0.230769	0.501093
2015-11-02	2	3	15	2014	12	34	76	0.447368	0.732669
2015-11-02	2	3	15	2014	14	44	91	0.483516	0.768912
2015-11-02	2	3	15	2014	18	38	69	0.550725	0.83621
2015-11-02	2	3	15	2014	20	7	25	0.28	0.557599
2015-11-02	2	3	40	2015	12	0	103	0	0
2015-11-02	2	3	40	2015	14	0	100	0	0
2015-11-02	2	3	40	2015	18	0	73	0	0
2015-11-02	2	3	40	2015	20	0	25	0	0
2015-11-02	2	3	80	2015	12	0	89	0	0
2015-11-02	2	3	80	2015	14	0	100	0	0
2015-11-02	2	3	80	2015	18	2	63	0.031746	0.179131
2015-11-02	2	3	80	2015	20	1	26	0.0384615	0.197396
2015-11-02	2	4	5	2015	12	2	105	0.0190476	0.138455
2015-11-02	2	4	5	2015	14	0	90	0	0
2015-11-02	2	4	5	2015	18	14	113	0.123894	0.359692
2015-11-02	2	4	5	2015	20	2	24	0.0833333	0.292843
2015-11-02	2	4	15	2015	12	0	66	0	0
2015-11-02	2	4	15	2015	14	0	86	0	0
2015-11-02	2	4	15	2015	18	0	45	0	0
2015-11-02	2	4	15	2015	20	1	24	0.0416667	0.205569
2015-11-02	2	4	40	2014	12	21	85	0.247059	0.520196
2015-11-02	2	4	40	2014	14	43	115	0.373913	0.657935
2015-11-02	2	4	40	2014	18	43	78	0.551282	0.836771
2015-11-02	2	4	40	2014	20	5	23	0.217391	0.48505
2015-11-02	2	4	80	2014	12	36	92	0.391304	0.675828
2015-11-02	2	4	80	2014	14	36	102	0.352941	0.636132
2015-11-02	2	4	80	2014	18	16	53	0.301887	0.581697
2015-11-02	2	4	80	2014	20	2	26	0.0769231	0.281035
2015-11-02	2	5	5	2015	12	1	114	0.00877193	0.0937961
2015-11-02	2	5	5	2015	14	0	82	0	0
2015-11-02	2	5	5	2015	18	0	54	0	0
2015-11-02	2	5	5	2015	20	3	24	0.125	0.361367
2015-11-02	2	5	15	2014	12	24	102	0.235294	0.506445
2015-11-02	2	5	15	2014	14	47	98	0.479592	0.764984
2015-11-02	2	5	15	2014	18	49	87	0.563218	0.848786
2015-11-02	2	5	15	2014	20	4	27	0.148148	0.3951
2015-11-02	2	5	40	2014	12	25	82	0.304878	0.58495
2015-11-02	2	5	40	2014	14	47	114	0.412281	0.697223
2015-11-02	2	5	40	2014	18	24	63	0.380952	0.665196
2015-11-02	2	5	40	2014	20	3	23	0.130435	0.369509
2015-11-02	2	5	80	2014	12	37	102	0.362745	0.646358
2015-11-02	2	5	80	2014	14	39	102	0.382353	0.666638
2015-11-02	2	5	80	2014	18	17	46	0.369565	0.653437
2015-11-02	2	5	80	2014	20	7	21	0.333333	0.61548
2016-01-03	1	1	5	2015	12	0	75	0	0
2016-01-03	1	1	5	2015	14	0	126	0	0
2016-01-03	1	1	5	2015	18	4	73	0.0519481	0.229942
2016-01-03	1	1	5	2015	20	6	19	0.24	0.511973
2016-01-03	1	1	15	2015	12	1	57	0.0172414	0.131687
2016-01-03	1	1	15	2015	14	0	102	0	0
2016-01-03	1	1	15	2015	18	2	57	0.0338983	0.185171
2016-01-03	1	1	15	2015	20	2	22	0.0833333	0.292843
2016-01-03	1	1	40	2014	12	25	39	0.390625	0.675132
2016-01-03	1	1	40	2014	14	78	53	0.59542	0.881407
2016-01-03	1	1	40	2014	18	27	51	0.346154	0.629015
2016-01-03	1	1	40	2014	20
2016-01-03	1	1	80	2015	12	0	95	0	0
2016-01-03	1	1	80	2015	14	0	131	0	0
2016-01-03	1	1	80	2015	18	3	83	0.0348837	0.187875
2016-01-03	1	1	80	2015	20	3	22	0.12	0.353742
2016-01-03	1	2	5	2014	12	33	45	0.423077	0.708168
2016-01-03	1	2	5	2014	14	88	41	0.682171	0.971861
2016-01-03	1	2	5	2014	18	24	36	0.4	0.684719
2016-01-03	1	2	5	2014	20
2016-01-03	1	2	15	2014	12	21	47	0.308824	0.589227
2016-01-03	1	2	15	2014	14	83	38	0.68595	0.975926
2016-01-03	1	2	15	2014	18	25	41	0.378788	0.662966
2016-01-03	1	2	15	2014	20	6	11	0.352941	0.636132
2016-01-03	1	2	40	2015	12	0	73	0	0
2016-01-03	1	2	40	2015	14	0	124	0	0
2016-01-03	1	2	40	2015	18	0	83	0	0
2016-01-03	1	2	40	2015	20	3	21	0.125	0.361367
2016-01-03	1	2	80	2014	12	27	55	0.329268	0.611161
2016-01-03	1	2	80	2014	14	55	54	0.504587	0.789985
2016-01-03	1	2	80	2014	18	51	27	0.653846	0.941782
2016-01-03	1	2	80	2014	20
2016-01-03	1	3	5	2015	12	1	71	0.0138889	0.118126
2016-01-03	1	3	5	2015	14	1	102	0.00970874	0.0986931
2016-01-03	1	3	5	2015	18	3	59	0.0483871	0.221784
2016-01-03	1	3	5	2015	20	7	17	0.291667	0.57051
2016-01-03	1	3	15	2015	12	0	62	0	0
2016-01-03	1	3	15	2015	14	1	139	0.00714286	0.0846164
2016-01-03	1	3	15	2015	18	0	78	0	0
2016-01-03	1	3	15	2015	20	1	28	0.0344828	0.186779
2016-01-03	1	3	40	2015	12	1	87	0.0113636	0.106803
2016-01-03	1	3	40	2015	14	0	126	0	0
2016-01-03	1	3	40	2015	18	1	58	0.0169492	0.13056
2016-01-03	1	3	40	2015	20	2	23	0.08	0.286757
2016-01-03	1	3	80	2014	12	40	64	0.384615	0.668964
2016-01-03	1	3	80	2014	14	91	40	0.694656	0.985341
2016-01-03	1	3	80	2014	18	41	23	0.640625	0.927946
2016-01-03	1	3	80	2014	20	3	13	0.1875	0.447832
2016-01-03	1	4	5	2014	12	21	72	0.225806	0.495181
2016-01-03	1	4	5	2014	14	69	41	0.627273	0.914087
2016-01-03	1	4	5	2014	18	17	31	0.354167	0.637414
2016-01-03	1	4	5	2014	20
2016-01-03	1	4	15	2015	12	0	91	0	0
2016-01-03	1	4	15	2015	14	0	98	0	0
2016-01-03	1	4	15	2015	18	2	109	0.018018	0.134638
2016-01-03	1	4	15	2015	20	9	17	0.346154	0.629015
2016-01-03	1	4	40	2014	12	40	56	0.416667	0.701674
2016-01-03	1	4	40	2014	14	72	56	0.5625	0.848062
2016-01-03	1	4	40	2014	18	29	38	0.432836	0.71803
2016-01-03	1	4	40	2014	20
2016-01-03	1	4	80	2014	12	31	49	0.3875	0.671927
2016-01-03	1	4	80	2014	14	84	44	0.65625	0.94431
2016-01-03	1	4	80	2014	18	53	37	0.588889	0.874762
2016-01-03	1	4	80	2014	20
2016-01-03	1	5	5	2014	12	33	37	0.471429	0.756811
2016-01-03	1	5	5	2014	14	83	46	0.643411	0.930852
2016-01-03	1	5	5	2014	18	27	51	0.346154	0.629015
2016-01-03	1	5	5	2014	20
2016-01-03	1	5	15	2015	12	0	78	0	0
2016-01-03	1	5	15	2015	14	1	113	0.00877193	0.0937961
2016-01-03	1	5	15	2015	18	1	61	0.016129	0.127344
2016-01-03	1	5	15	2015	20	3	22	0.12	0.353742
2016-01-03	1	5	40	2015	12	0	73	0	0
2016-01-03	1	5	40	2015	14	0	134	0	0
2016-01-03	1	5	40	2015	18	4	88	0.0434783	0.210056
2016-01-03	1	5	40	2015	20	5	21	0.192308	0.453961
2016-01-03	1	5	80	2014	12	29	48	0.376623	0.660734
2016-01-03	1	5	80	2014	14	77	42	0.647059	0.934664
2016-01-03	1	5	80	2014	18	55	38	0.591398	0.877313
2016-01-03	1	5	80	2014	20
2016-01-03	2	1	5	2014	12	29	33	0.467742	0.753118
2016-01-03	2	1	5	2014	14	67	43	0.609091	0.895374
2016-01-03	2	1	5	2014	18	36	35	0.507042	0.792441
2016-01-03	2	1	5	2014	20	5	14	0.263158	0.538663
2016-01-03	2	1	15	2015	12	0	98	0	0
2016-01-03	2	1	15	2015	14	0	98	0	0
2016-01-03	2	1	15	2015	18	2	55	0.0350877	0.18843
2016-01-03	2	1	15	2015	20	5	19	0.208333	0.473985
2016-01-03	2	1	40	2014	12	17	49	0.257576	0.532303
2016-01-03	2	1	40	2014	14	88	33	0.727273	1.02133
2016-01-03	2	1	40	2014	18	36	36	0.5	0.785398
2016-01-03	2	1	40	2014	20	2	15	0.117647	0.350106
2016-01-03	2	1	80	2015	12	0	88	0	0
2016-01-03	2	1	80	2015	14	0	88	0	0
2016-01-03	2	1	80	2015	18	4	77	0.0493827	0.224093
2016-01-03	2	1	80	2015	20	2	21	0.0869565	0.299334
2016-01-03	2	2	5	2015	12	1	75	0.0131579	0.114961
2016-01-03	2	2	5	2015	14	3	123	0.0238095	0.154922
2016-01-03	2	2	5	2015	18	4	76	0.05	0.225513
2016-01-03	2	2	5	2015	20	7	19	0.269231	0.545534
2016-01-03	2	2	15	2014	12	25	57	0.304878	0.58495
2016-01-03	2	2	15	2014	14	106	48	0.688312	0.978472
2016-01-03	2	2	15	2014	18	36	34	0.514286	0.799686
2016-01-03	2	2	15	2014	20
2016-01-03	2	2	40	2014	12	30	47	0.38961	0.674091
2016-01-03	2	2	40	2014	14	103	47	0.686667	0.976698
2016-01-03	2	2	40	2014	18	40	35	0.533333	0.818756
2016-01-03	2	2	40	2014	20
2016-01-03	2	2	80	2015	12	0	75	0	0
2016-01-03	2	2	80	2015	14	0	120	0	0
2016-01-03	2	2	80	2015	18	3	62	0.0461538	0.216522
2016-01-03	2	2	80	2015	20	2	24	0.0769231	0.281035
2016-01-03	2	3	5	2015	12	0	73	0	0
2016-01-03	2	3	5	2015	14	2	134	0.0147059	0.121567
2016-01-03	2	3	5	2015	18	20	41	0.327869	0.609672
2016-01-03	2	3	5	2015	20	20	8	0.714286	1.00685
2016-01-03	2	3	15	2014	12	31	41	0.430556	0.715728
2016-01-03	2	3	15	2014	14	79	61	0.564286	0.849862
2016-01-03	2	3	15	2014	18	21	48	0.304348	0.584374
2016-01-03	2	3	15	2014	20
2016-01-03	2	3	40	2015	12	1	79	0.0125	0.112038
2016-01-03	2	3	40	2015	14	0	126	0	0
2016-01-03	2	3	40	2015	18	3	71	0.0405405	0.202733
2016-01-03	2	3	40	2015	20	3	21	0.125	0.361367
2016-01-03	2	3	80	2015	12	0	70	0	0
2016-01-03	2	3	80	2015	14	0	135	0	0
2016-01-03	2	3	80	2015	18	4	65	0.057971	0.243161
2016-01-03	2	3	80	2015	20	3	19	0.136364	0.378228
2016-01-03	2	4	5	2015	12	0	78	0	0
2016-01-03	2	4	5	2015	14	1	114	0.00869565	0.0933862
2016-01-03	2	4	5	2015	18	8	111	0.0672269	0.262278
2016-01-03	2	4	5	2015	20	9	16	0.36	0.643501
2016-01-03	2	4	15	2014	12	40	46	0.465116	0.750486
2016-01-03	2	4	15	2014	14	74	49	0.601626	0.887737
2016-01-03	2	4	15	2014	18	19	44	0.301587	0.58137
2016-01-03	2	4	15	2014	20
2016-01-03	2	4	40	2014	12	21	33	0.388889	0.673352
2016-01-03	2	4	40	2014	14	91	40	0.694656	0.985341
2016-01-03	2	4	40	2014	18	31	43	0.418919	0.703957
2016-01-03	2	4	40	2014	20
2016-01-03	2	4	80	2015	12	0	76	0	0
2016-01-03	2	4	80	2015	14	0	134	0	0
2016-01-03	2	4	80	2015	18	2	71	0.0273973	0.166286
2016-01-03	2	4	80	2015	20	2	21	0.0869565	0.299334
2016-01-03	2	5	5	2014	12	33	53	0.383721	0.668045
2016-01-03	2	5	5	2014	14	91	36	0.716535	1.00935
2016-01-03	2	5	5	2014	18	46	45	0.505495	0.790893
2016-01-03	2	5	5	2014	20
2016-01-03	2	5	15	2014	12	34	36	0.485714	0.771111
2016-01-03	2	5	15	2014	14	70	51	0.578512	0.864237
2016-01-03	2	5	15	2014	18	31	44	0.413333	0.698292
2016-01-03	2	5	15	2014	20
2016-01-03	2	5	40	2015	12	1	59	0.0166667	0.129461
2016-01-03	2	5	40	2015	14	0	119	0	0
2016-01-03	2	5	40	2015	18	1	64	0.0153846	0.124355
2016-01-03	2	5	40	2015	20	9	16	0.36	0.643501
2016-01-03	2	5	80	2014	12	21	52	0.287671	0.566106
2016-01-03	2	5	80	2014	14	65	41	0.613208	0.899596
2016-01-03	2	5	80	2014	18	44	31	0.586667	0.872505
2016-01-03	2	5	80	2014	20
2016-02-29	1	1	5	2014	12	27	54	0.5	0.785398
2016-02-29	1	1	5	2014	14	60	100	0.6	0.886077
2016-02-29	1	1	5	2014	18	36	80	0.45	0.735314
2016-02-29	1	1	5	2014	20
2016-02-29	1	1	15	2014	12	13	45	0.288889	0.56745
2016-02-29	1	1	15	2014	14	60	111	0.540541	0.825983
2016-02-29	1	1	15	2014	18	34	70	0.485714	0.771111
2016-02-29	1	1	15	2014	20
2016-02-29	1	1	40	2014	12	16	50	0.32	0.601264
2016-02-29	1	1	40	2014	14	33	92	0.358696	0.642142
2016-02-29	1	1	40	2014	18	20	60	0.333333	0.61548
2016-02-29	1	1	40	2014	20
2016-02-29	1	1	80	2014	12	16	53	0.301887	0.581697
2016-02-29	1	1	80	2014	14	43	93	0.462366	0.747728
2016-02-29	1	1	80	2014	18	32	70	0.457143	0.742488
2016-02-29	1	1	80	2014	20
2016-02-29	1	2	5	2014	12	14	58	0.241379	0.513586
2016-02-29	1	2	5	2014	14	50	108	0.462963	0.748327
2016-02-29	1	2	5	2014	18	26	55	0.472727	0.758112
2016-02-29	1	2	5	2014	20
2016-02-29	1	2	15	2014	12	17	57	0.298246	0.577724
2016-02-29	1	2	15	2014	14	40	85	0.470588	0.755969
2016-02-29	1	2	15	2014	18	32	74	0.432432	0.717623
2016-02-29	1	2	15	2014	20
2016-02-29	1	2	40	2014	12	22	54	0.407407	0.692268
2016-02-29	1	2	40	2014	14	38	94	0.404255	0.689058
2016-02-29	1	2	40	2014	18	15	53	0.283019	0.560955
2016-02-29	1	2	40	2014	20
2016-02-29	1	2	80	2014	12	17	56	0.303571	0.58353
2016-02-29	1	2	80	2014	14	50	91	0.549451	0.83493
2016-02-29	1	2	80	2014	18	18	72	0.25	0.523599
2016-02-29	1	2	80	2014	20
2016-02-29	1	3	5	2014	12	20	46	0.434783	0.719994
2016-02-29	1	3	5	2014	14	49	86	0.569767	0.855394
2016-02-29	1	3	5	2014	18	27	74	0.364865	0.648561
2016-02-29	1	3	5	2014	20
2016-02-29	1	3	15	2014	12	23	53	0.433962	0.719167
2016-02-29	1	3	15	2014	14	42	104	0.403846	0.688642
2016-02-29	1	3	15	2014	18	35	80	0.4375	0.722734
2016-02-29	1	3	15	2014	20
2016-02-29	1	3	40	2014	12	9	51	0.176471	0.433538
2016-02-29	1	3	40	2014	14	40	82	0.487805	0.773202
2016-02-29	1	3	40	2014	18	40	77	0.519481	0.804884
2016-02-29	1	3	40	2014	20
2016-02-29	1	3	80	2014	12	11	48	0.229167	0.499189
2016-02-29	1	3	80	2014	14	44	113	0.389381	0.673856
2016-02-29	1	3	80	2014	18	21	58	0.362069	0.645655
2016-02-29	1	3	80	2014	20
2016-02-29	1	4	5	2014	12	24	51	0.470588	0.755969
2016-02-29	1	4	5	2014	14	56	96	0.583333	0.869122
2016-02-29	1	4	5	2014	18	31	65	0.476923	0.762313
2016-02-29	1	4	5	2014	20
2016-02-29	1	4	15	2014	12	19	50	0.38	0.664215
2016-02-29	1	4	15	2014	14	55	97	0.56701	0.852611
2016-02-29	1	4	15	2014	18	30	71	0.422535	0.70762
2016-02-29	1	4	15	2014	20
2016-02-29	1	4	40	2014	12	17	53	0.320755	0.602073
2016-02-29	1	4	40	2014	14	60	102	0.588235	0.874098
2016-02-29	1	4	40	2014	18	45	83	0.542169	0.827617
2016-02-29	1	4	40	2014	20
2016-02-29	1	4	80	2014	12	12	56	0.214286	0.481275
2016-02-29	1	4	80	2014	14	52	96	0.541667	0.827113
2016-02-29	1	4	80	2014	18	29	97	0.298969	0.578514
2016-02-29	1	4	80	2014	20
2016-02-29	1	5	5	2014	12	36	71	0.507042	0.792441
2016-02-29	1	5	5	2014	14	58	104	0.557692	0.843219
2016-02-29	1	5	5	2014	18	45	74	0.608108	0.894367
2016-02-29	1	5	5	2014	20
2016-02-29	1	5	15	2014	12	26	61	0.42623	0.711357
2016-02-29	1	5	15	2014	14	66	103	0.640777	0.928104
2016-02-29	1	5	15	2014	18	20	67	0.298507	0.57801
2016-02-29	1	5	15	2014	20
2016-02-29	1	5	40	2014	12	13	36	0.361111	0.644658
2016-02-29	1	5	40	2014	14	56	99	0.565657	0.851245
2016-02-29	1	5	40	2014	18	34	81	0.419753	0.704803
2016-02-29	1	5	40	2014	20
2016-02-29	1	5	80	2014	12	27	59	0.457627	0.742974
2016-02-29	1	5	80	2014	14	45	86	0.523256	0.808662
2016-02-29	1	5	80	2014	18	20	65	0.307692	0.588003
2016-02-29	1	5	80	2014	20
