# Supplementary material for: The Florida Harvester Ant, Pogonomyrmex badius, Relies on Germination to Consume Large Seeds
Source: PLoS One. 2016 Nov 28;11(11):e0166907. doi: 10.1371/journal.pone.0166907 (PMC5125654; doi:10.1371/journal.pone.0166907)
Supplement: S3 Table — (XLSX) [file pone.0166907.s003.xlsx]

## Sheet: Lab Germination data 2016, fina
sample	Date of check	temperature	seed source	replicate	sieve size	number germinated	total seeds	percent germinated	Notes	NewVar2	NewVar3	line number
Feb	2015-01-30	10	2014	1	12	0	70	0				1
Feb	2015-01-30	10	2014	1	14	0	104	0				2
Feb	2015-01-30	10	2014	1	18	0	63	0				3
Feb	2015-01-30	10	2014	1	20	1	38	0.0263158				4
Feb	2015-01-30	15	2014	1	12	0	96	0				5
Feb	2015-01-30	15	2014	1	14	0	108	0				6
Feb	2015-01-30	15	2014	1	18	0	75	0				7
Feb	2015-01-30	15	2014	1	20	0	21	0				8
Feb	2015-01-30	24	2014	1	12	6	89	0.0674157				9
Feb	2015-01-30	24	2014	1	14	1	108	0.00925926				10
Feb	2015-01-30	24	2014	1	18	4	84	0.047619				11
Feb	2015-01-30	24	2014	1	20	0	22	0				12
Feb	2015-01-30	32	2014	1	12	3	102	0.0294118				13
Feb	2015-01-30	32	2014	1	14	1	110	0.00909091				14
Feb	2015-01-30	32	2014	1	18	7	76	0.0921053				15
Feb	2015-01-30	32	2014	1	20	0	20	0				16
Feb	2015-01-30	10	2014	2	12	0	72	0				17
Feb	2015-01-30	10	2014	2	14	0	107	0				18
Feb	2015-01-30	10	2014	2	18	0	62	0				19
Feb	2015-01-30	10	2014	2	20	0	32	0				20
Feb	2015-01-30	15	2014	2	12	0	79	0				21
Feb	2015-01-30	15	2014	2	14	0	116	0				22
Feb	2015-01-30	15	2014	2	18	0	71	0				23
Feb	2015-01-30	15	2014	2	20	0	26	0				24
Feb	2015-01-30	24	2014	2	12	5	101	0.049505				25
Feb	2015-01-30	24	2014	2	14	1	106	0.00943396				26
Feb	2015-01-30	24	2014	2	18	2	85	0.0235294				27
Feb	2015-01-30	24	2014	2	20	0	41	0				28
Feb	2015-01-30	32	2014	2	12	7	87	0.0804598				29
Feb	2015-01-30	32	2014	2	14	0	107	0				30
Feb	2015-01-30	32	2014	2	18	6	56	0.107143				31
Feb	2015-01-30	32	2014	2	20	0	20	0				32
Feb	2015-01-30	10	2014	3	12	0	70	0				33
Feb	2015-01-30	10	2014	3	14	0	110	0				34
Feb	2015-01-30	10	2014	3	18	0	62	0				35
Feb	2015-01-30	10	2014	3	20	0	41	0				36
Feb	2015-01-30	15	2014	3	12	0	73	0				37
Feb	2015-01-30	15	2014	3	14	0	95	0				38
Feb	2015-01-30	15	2014	3	18	0	63	0				39
Feb	2015-01-30	15	2014	3	20	0	23	0				40
Feb	2015-01-30	24	2014	3	12	10	103	0.0970874				41
Feb	2015-01-30	24	2014	3	14	1	84	0.0119048				42
Feb	2015-01-30	24	2014	3	18	3	73	0.0410959				43
Feb	2015-01-30	24	2014	3	20	0	37	0				44
Feb	2015-01-30	32	2014	3	12	7	92	0.076087				45
Feb	2015-01-30	32	2014	3	14	3	96	0.03125				46
Feb	2015-01-30	32	2014	3	18	3	70	0.0428571				47
Feb	2015-01-30	32	2014	3	20	0	25	0				48
Feb	2015-01-30	10	2014	4	12	0	74	0				49
Feb	2015-01-30	10	2014	4	14	0	108	0				50
Feb	2015-01-30	10	2014	4	18	0	66	0				51
Feb	2015-01-30	10	2014	4	20	0	27	0				52
Feb	2015-01-30	15	2014	4	12	0	85	0				53
Feb	2015-01-30	15	2014	4	14	0	94	0				54
Feb	2015-01-30	15	2014	4	18	0	77	0				55
Feb	2015-01-30	15	2014	4	20	0	31	0				56
Feb	2015-01-30	24	2014	4	12	4	95	0.0421053				57
Feb	2015-01-30	24	2014	4	14	0	105	0				58
Feb	2015-01-30	24	2014	4	18	1	72	0.0138889				59
Feb	2015-01-30	24	2014	4	20	0	38	0				60
Feb	2015-01-30	32	2014	4	12	7	108	0.0648148				61
Feb	2015-01-30	32	2014	4	14	0	107	0				62
Feb	2015-01-30	32	2014	4	18	7	104	0.0673077				63
Feb	2015-01-30	32	2014	4	20	1	27	0.037037				64
Feb	2015-01-30	10	2014	5	12	0	100	0				65
Feb	2015-01-30	10	2014	5	14	0	103	0				66
Feb	2015-01-30	10	2014	5	18	0	65	0				67
Feb	2015-01-30	10	2014	5	20	0	59	0				68
Feb	2015-01-30	15	2014	5	12	0	93	0				69
Feb	2015-01-30	15	2014	5	14	0	100	0				70
Feb	2015-01-30	15	2014	5	18	0	64	0				71
Feb	2015-01-30	15	2014	5	20	0	31	0				72
Feb	2015-01-30	24	2014	5	12	4	85	0.0470588				73
Feb	2015-01-30	24	2014	5	14	1	97	0.0103093				74
Feb	2015-01-30	24	2014	5	18	0	75	0				75
Feb	2015-01-30	24	2014	5	20	0	42	0				76
Feb	2015-01-30	32	2014	5	12	4	95	0.0421053				77
Feb	2015-01-30	32	2014	5	14	0	110	0				78
Feb	2015-01-30	32	2014	5	18	8	80	0.1				79
Feb	2015-01-30	32	2014	5	20	0	22	0				80
Feb												81
Feb	2015-02-02	10	2014	1	12	1	70	0.0142857		0		82
Feb	2015-02-02	10	2014	1	14	0	104	0		0		83
Feb	2015-02-02	10	2014	1	18	0	63	0		0		84
Feb	2015-02-02	10	2014	1	20	0	38	0		0		85
Feb	2015-02-02	15	2014	1	12	10	96	0.104167		0		86
Feb	2015-02-02	15	2014	1	14	0	108	0		0		87
Feb	2015-02-02	15	2014	1	18	0	75	0		0		88
Feb	2015-02-02	15	2014	1	20	0	21	0		0		89
Feb	2015-02-02	24	2014	1	12	9	89	0.101124		0		90
Feb	2015-02-02	24	2014	1	14	1	108	0.00925926		0		91
Feb	2015-02-02	24	2014	1	18	13	84	0.154762		0		92
Feb	2015-02-02	24	2014	1	20	0	22	0		0		93
Feb	2015-02-02	32	2014	1	12	18	102	0.176471		0		94
Feb	2015-02-02	32	2014	1	14	1	110	0.00909091		0		95
Feb	2015-02-02	32	2014	1	18	8	76	0.105263		0		96
Feb	2015-02-02	32	2014	1	20	0	20	0		0		97
Feb	2015-02-02	10	2014	2	12	0	72	0		0		98
Feb	2015-02-02	10	2014	2	14	0	107	0		0		99
Feb	2015-02-02	10	2014	2	18	0	62	0		0		100
Feb	2015-02-02	10	2014	2	20	0	32	0		0		101
Feb	2015-02-02	15	2014	2	12	9	79	0.113924		0		102
Feb	2015-02-02	15	2014	2	14	1	116	0.00862069		0		103
Feb	2015-02-02	15	2014	2	18	4	71	0.056338		0		104
Feb	2015-02-02	15	2014	2	20	0	26	0		0		105
Feb	2015-02-02	24	2014	2	12	4	101	0.039604		0		106
Feb	2015-02-02	24	2014	2	14	4	106	0.0377358		0		107
Feb	2015-02-02	24	2014	2	18	20	85	0.235294		0		108
Feb	2015-02-02	24	2014	2	20	1	41	0.0243902		0		109
Feb	2015-02-02	32	2014	2	12	12	87	0.137931		0		110
Feb	2015-02-02	32	2014	2	14	1	107	0.00934579		0		111
Feb	2015-02-02	32	2014	2	18	3	56	0.0535714		0		112
Feb	2015-02-02	32	2014	2	20	0	20	0		0		113
Feb	2015-02-02	10	2014	3	12	0	70	0		0		114
Feb	2015-02-02	10	2014	3	14	0	110	0		0		115
Feb	2015-02-02	10	2014	3	18	0	62	0		0		116
Feb	2015-02-02	10	2014	3	20	1	41	0.0243902		0		117
Feb	2015-02-02	15	2014	3	12	5	73	0.0684932		0		118
Feb	2015-02-02	15	2014	3	14	1	95	0.0105263		0		119
Feb	2015-02-02	15	2014	3	18	1	63	0.015873		0		120
Feb	2015-02-02	15	2014	3	20	0	23	0		0		121
Feb	2015-02-02	24	2014	3	12	7	103	0.0679612		0		122
Feb	2015-02-02	24	2014	3	14	1	84	0.0119048		0		123
Feb	2015-02-02	24	2014	3	18	13	73	0.178082		0		124
Feb	2015-02-02	24	2014	3	20	0	37	0		0		125
Feb	2015-02-02	32	2014	3	12	14	92	0.152174		0		126
Feb	2015-02-02	32	2014	3	14	1	96	0.0104167		0		127
Feb	2015-02-02	32	2014	3	18	7	70	0.1		0		128
Feb	2015-02-02	32	2014	3	20	0	25	0		0		129
Feb	2015-02-02	10	2014	4	12	0	74	0		0		130
Feb	2015-02-02	10	2014	4	14	0	108	0		0		131
Feb	2015-02-02	10	2014	4	18	2	66	0.030303		0		132
Feb	2015-02-02	10	2014	4	20	0	27	0		0		133
Feb	2015-02-02	15	2014	4	12	3	85	0.0352941		0		134
Feb	2015-02-02	15	2014	4	14	0	94	0		0		135
Feb	2015-02-02	15	2014	4	18	2	77	0.025974		0		136
Feb	2015-02-02	15	2014	4	20	0	31	0		0		137
Feb	2015-02-02	24	2014	4	12	8	95	0.0842105		0		138
Feb	2015-02-02	24	2014	4	14	0	105	0		0		139
Feb	2015-02-02	24	2014	4	18	11	72	0.152778		0		140
Feb	2015-02-02	24	2014	4	20	0	38	0		0		141
Feb	2015-02-02	32	2014	4	12	13	108	0.12037		0		142
Feb	2015-02-02	32	2014	4	14	0	107	0		0		143
Feb	2015-02-02	32	2014	4	18	13	104	0.125		0		144
Feb	2015-02-02	32	2014	4	20	0	27	0		0		145
Feb	2015-02-02	10	2014	5	12	1	100	0.01		0		146
Feb	2015-02-02	10	2014	5	14	0	103	0		0		147
Feb	2015-02-02	10	2014	5	18	1	65	0.0153846		0		148
Feb	2015-02-02	10	2014	5	20	0	59	0		0		149
Feb	2015-02-02	15	2014	5	12	2	93	0.0215054		0		150
Feb	2015-02-02	15	2014	5	14	1	100	0.01		0		151
Feb	2015-02-02	15	2014	5	18	3	64	0.046875		0		152
Feb	2015-02-02	15	2014	5	20	0	31	0		0		153
Feb	2015-02-02	24	2014	5	12	9	85	0.105882		0		154
Feb	2015-02-02	24	2014	5	14	1	97	0.0103093		0		155
Feb	2015-02-02	24	2014	5	18	9	75	0.12		0		156
Feb	2015-02-02	24	2014	5	20	0	42	0		0		157
Feb	2015-02-02	32	2014	5	12	7	95	0.0736842		0		158
Feb	2015-02-02	32	2014	5	14	0	110	0		0		159
Feb	2015-02-02	32	2014	5	18	10	80	0.125		0		160
Feb	2015-02-02	32	2014	5	20	2	22	0.0909091		0		161
Feb												162
Feb	2015-02-04	10	2014	1	12	0	70	0		0		163
Feb	2015-02-04	10	2014	1	14	0	104	0		0		164
Feb	2015-02-04	10	2014	1	18	1	63	0.015873		0		165
Feb	2015-02-04	10	2014	1	20	0	38	0		0		166
Feb	2015-02-04	15	2014	1	12	6	96	0.0625		0		167
Feb	2015-02-04	15	2014	1	14	1	108	0.00925926		0		168
Feb	2015-02-04	15	2014	1	18	0	75	0		0		169
Feb	2015-02-04	15	2014	1	20	0	21	0		0		170
Feb	2015-02-04	24	2014	1	12	4	89	0.0449438		0		171
Feb	2015-02-04	24	2014	1	14	6	108	0.0555556		0		172
Feb	2015-02-04	24	2014	1	18	3	84	0.0357143		0		173
Feb	2015-02-04	24	2014	1	20	0	22	0		0		174
Feb	2015-02-04	32	2014	1	12	4	102	0.0392157		0		175
Feb	2015-02-04	32	2014	1	14	1	110	0.00909091		0		176
Feb	2015-02-04	32	2014	1	18	3	76	0.0394737		0		177
Feb	2015-02-04	32	2014	1	20	0	20	0		0		178
Feb	2015-02-04	10	2014	2	12	0	72	0		0		179
Feb	2015-02-04	10	2014	2	14	1	107	0.00934579		0		180
Feb	2015-02-04	10	2014	2	18	1	62	0.016129		0		181
Feb	2015-02-04	10	2014	2	20	0	32	0		0		182
Feb	2015-02-04	15	2014	2	12	5	79	0.0632911		0		183
Feb	2015-02-04	15	2014	2	14	1	116	0.00862069		0		184
Feb	2015-02-04	15	2014	2	18	1	71	0.0140845		0		185
Feb	2015-02-04	15	2014	2	20	0	26	0		0		186
Feb	2015-02-04	24	2014	2	12	3	101	0.029703		0		187
Feb	2015-02-04	24	2014	2	14	1	106	0.00943396		0		188
Feb	2015-02-04	24	2014	2	18	6	85	0.0705882		0		189
Feb	2015-02-04	24	2014	2	20	0	41	0		0		190
Feb	2015-02-04	32	2014	2	12	0	87	0		0		191
Feb	2015-02-04	32	2014	2	14	0	107	0		0		192
Feb	2015-02-04	32	2014	2	18	0	56	0		0		193
Feb	2015-02-04	32	2014	2	20	0	20	0		0		194
Feb	2015-02-04	10	2014	3	12	0	70	0		0		195
Feb	2015-02-04	10	2014	3	14	0	110	0		0		196
Feb	2015-02-04	10	2014	3	18	2	62	0.0322581		0		197
Feb	2015-02-04	10	2014	3	20	0	41	0		0		198
Feb	2015-02-04	15	2014	3	12	8	73	0.109589		0		199
Feb	2015-02-04	15	2014	3	14	0	95	0		0		200
Feb	2015-02-04	15	2014	3	18	2	63	0.031746		0		201
Feb	2015-02-04	15	2014	3	20	1	23	0.0434783		0		202
Feb	2015-02-04	24	2014	3	12	0	103	0		0		203
Feb	2015-02-04	24	2014	3	14	3	84	0.0357143		0		204
Feb	2015-02-04	24	2014	3	18	5	73	0.0684932		0		205
Feb	2015-02-04	24	2014	3	20	1	37	0.027027		0		206
Feb	2015-02-04	32	2014	3	12	2	92	0.0217391		0		207
Feb	2015-02-04	32	2014	3	14	0	96	0		0		208
Feb	2015-02-04	32	2014	3	18	1	70	0.0142857		0		209
Feb	2015-02-04	32	2014	3	20	0	25	0		0		210
Feb	2015-02-04	10	2014	4	12	1	74	0.0135135		0		211
Feb	2015-02-04	10	2014	4	14	0	108	0		0		212
Feb	2015-02-04	10	2014	4	18	1	66	0.0151515		0		213
Feb	2015-02-04	10	2014	4	20	0	27	0		0		214
Feb	2015-02-04	15	2014	4	12	16	85	0.188235		0		215
Feb	2015-02-04	15	2014	4	14	1	94	0.0106383		0		216
Feb	2015-02-04	15	2014	4	18	1	77	0.012987		0		217
Feb	2015-02-04	15	2014	4	20	1	31	0.0322581		0		218
Feb	2015-02-04	24	2014	4	12	5	95	0.0526316		0		219
Feb	2015-02-04	24	2014	4	14	2	105	0.0190476		0		220
Feb	2015-02-04	24	2014	4	18	7	72	0.0972222		0		221
Feb	2015-02-04	24	2014	4	20	1	38	0.0263158		0		222
Feb	2015-02-04	32	2014	4	12	3	108	0.0277778		0		223
Feb	2015-02-04	32	2014	4	14	0	107	0		0		224
Feb	2015-02-04	32	2014	4	18	0	104	0		0		225
Feb	2015-02-04	32	2014	4	20	0	27	0		0		226
Feb	2015-02-04	10	2014	5	12	0	100	0		0		227
Feb	2015-02-04	10	2014	5	14	0	103	0		0		228
Feb	2015-02-04	10	2014	5	18	1	65	0.0153846		0		229
Feb	2015-02-04	10	2014	5	20	0	59	0		0		230
Feb	2015-02-04	15	2014	5	12	14	93	0.150538		0		231
Feb	2015-02-04	15	2014	5	14	0	100	0		0		232
Feb	2015-02-04	15	2014	5	18	0	64	0		0		233
Feb	2015-02-04	15	2014	5	20	1	31	0.0322581		0		234
Feb	2015-02-04	24	2014	5	12	1	85	0.0117647		0		235
Feb	2015-02-04	24	2014	5	14	4	97	0.0412371		0		236
Feb	2015-02-04	24	2014	5	18	5	75	0.0666667		0		237
Feb	2015-02-04	24	2014	5	20	0	42	0		0		238
Feb	2015-02-04	32	2014	5	12	3	95	0.0315789		0		239
Feb	2015-02-04	32	2014	5	14	0	110	0		0		240
Feb	2015-02-04	32	2014	5	18	2	80	0.025		0		241
Feb	2015-02-04	32	2014	5	20	0	22	0		0		242
Feb												243
Feb	2015-02-06	10	2014	1	12	1	70	0.0142857		0		244
Feb	2015-02-06	10	2014	1	14	1	104	0.00961538		0		245
Feb	2015-02-06	10	2014	1	18	1	63	0.015873		0		246
Feb	2015-02-06	10	2014	1	20	0	38	0		0		247
Feb	2015-02-06	15	2014	1	12	4	96	0.0416667		0		248
Feb	2015-02-06	15	2014	1	14	2	108	0.0185185		0		249
Feb	2015-02-06	15	2014	1	18	4	75	0.0533333		0		250
Feb	2015-02-06	15	2014	1	20	2	21	0.0952381		0		251
Feb	2015-02-06	24	2014	1	12	4	89	0.0449438		0		252
Feb	2015-02-06	24	2014	1	14	9	108	0.0833333		0		253
Feb	2015-02-06	24	2014	1	18	2	84	0.0238095		0		254
Feb	2015-02-06	24	2014	1	20	1	22	0.0454545		0		255
Feb	2015-02-06	32	2014	1	12	2	102	0.0196078		0		256
Feb	2015-02-06	32	2014	1	14	1	110	0.00909091		0		257
Feb	2015-02-06	32	2014	1	18	0	76	0		0		258
Feb	2015-02-06	32	2014	1	20	0	20	0		0		259
Feb	2015-02-06	10	2014	2	12	1	72	0.0138889		0		260
Feb	2015-02-06	10	2014	2	14	0	107	0		0		261
Feb	2015-02-06	10	2014	2	18	2	62	0.0322581		0		262
Feb	2015-02-06	10	2014	2	20	0	32	0		0		263
Feb	2015-02-06	15	2014	2	12	4	79	0.0506329		0		264
Feb	2015-02-06	15	2014	2	14	1	116	0.00862069		0		265
Feb	2015-02-06	15	2014	2	18	5	71	0.0704225		0		266
Feb	2015-02-06	15	2014	2	20	1	26	0.0384615		0		267
Feb	2015-02-06	24	2014	2	12	1	101	0.00990099		0		268
Feb	2015-02-06	24	2014	2	14	4	106	0.0377358		0		269
Feb	2015-02-06	24	2014	2	18	1	85	0.0117647		0		270
Feb	2015-02-06	24	2014	2	20	0	41	0		0		271
Feb	2015-02-06	32	2014	2	12	2	87	0.0229885		0		272
Feb	2015-02-06	32	2014	2	14	0	107	0		0		273
Feb	2015-02-06	32	2014	2	18	1	56	0.0178571		0		274
Feb	2015-02-06	32	2014	2	20	0	20	0		0		275
Feb	2015-02-06	10	2014	3	12	0	70	0		0		276
Feb	2015-02-06	10	2014	3	14	0	110	0		0		277
Feb	2015-02-06	10	2014	3	18	1	62	0.016129		0		278
Feb	2015-02-06	10	2014	3	20	0	41	0		0		279
Feb	2015-02-06	15	2014	3	12	2	73	0.0273973		0		280
Feb	2015-02-06	15	2014	3	14	1	95	0.0105263		0		281
Feb	2015-02-06	15	2014	3	18	3	63	0.047619		0		282
Feb	2015-02-06	15	2014	3	20	1	23	0.0434783		0		283
Feb	2015-02-06	24	2014	3	12	2	103	0.0194175		0		284
Feb	2015-02-06	24	2014	3	14	2	84	0.0238095		0		285
Feb	2015-02-06	24	2014	3	18	3	73	0.0410959		0		286
Feb	2015-02-06	24	2014	3	20	0	37	0		0		287
Feb	2015-02-06	32	2014	3	12	3	92	0.0326087		0		288
Feb	2015-02-06	32	2014	3	14	0	96	0		0		289
Feb	2015-02-06	32	2014	3	18	1	70	0.0142857		0		290
Feb	2015-02-06	32	2014	3	20	0	25	0		0		291
Feb	2015-02-06	10	2014	4	12	0	74	0		0		292
Feb	2015-02-06	10	2014	4	14	0	108	0		0		293
Feb	2015-02-06	10	2014	4	18	1	66	0.0151515		0		294
Feb	2015-02-06	10	2014	4	20	0	27	0		0		295
Feb	2015-02-06	15	2014	4	12	3	85	0.0352941		0		296
Feb	2015-02-06	15	2014	4	14	1	94	0.0106383		0		297
Feb	2015-02-06	15	2014	4	18	2	77	0.025974		0		298
Feb	2015-02-06	15	2014	4	20	1	31	0.0322581		0		299
Feb	2015-02-06	24	2014	4	12	1	95	0.0105263		0		300
Feb	2015-02-06	24	2014	4	14	6	105	0.0571429		0		301
Feb	2015-02-06	24	2014	4	18	3	72	0.0416667		0		302
Feb	2015-02-06	24	2014	4	20	1	38	0.0263158		0		303
Feb	2015-02-06	32	2014	4	12	4	108	0.037037		0		304
Feb	2015-02-06	32	2014	4	14	0	107	0		0		305
Feb	2015-02-06	32	2014	4	18	0	104	0		0		306
Feb	2015-02-06	32	2014	4	20	0	27	0		0		307
Feb	2015-02-06	10	2014	5	12	0	100	0		0		308
Feb	2015-02-06	10	2014	5	14	0	103	0		0		309
Feb	2015-02-06	10	2014	5	18	0	65	0		0		310
Feb	2015-02-06	10	2014	5	20	0	59	0		0		311
Feb	2015-02-06	15	2014	5	12	7	93	0.0752688		0		312
Feb	2015-02-06	15	2014	5	14	1	100	0.01		0		313
Feb	2015-02-06	15	2014	5	18	1	64	0.015625		0		314
Feb	2015-02-06	15	2014	5	20	1	31	0.0322581		0		315
Feb	2015-02-06	24	2014	5	12	3	85	0.0352941		0		316
Feb	2015-02-06	24	2014	5	14	8	97	0.0824742		0		317
Feb	2015-02-06	24	2014	5	18	4	75	0.0533333		0		318
Feb	2015-02-06	24	2014	5	20	0	42	0		0		319
Feb	2015-02-06	32	2014	5	12	2	95	0.0210526		0		320
Feb	2015-02-06	32	2014	5	14	0	110	0		0		321
Feb	2015-02-06	32	2014	5	18	0	80	0		0		322
Feb	2015-02-06	32	2014	5	20	0	22	0		0		323
Feb												324
Feb	2015-02-09	10	2014	1	12	0	70	0		0		325
Feb	2015-02-09	10	2014	1	14	1	104	0.00961538		0		326
Feb	2015-02-09	10	2014	1	18	5	63	0.0793651		0		327
Feb	2015-02-09	10	2014	1	20	2	38	0.0526316		0		328
Feb	2015-02-09	15	2014	1	12	0	96	0		0		329
Feb	2015-02-09	15	2014	1	14	11	108	0.101852		0		330
Feb	2015-02-09	15	2014	1	18	5	75	0.0666667		0		331
Feb	2015-02-09	15	2014	1	20	0	21	0		0		332
Feb	2015-02-09	24	2014	1	12	2	89	0.0224719		0		333
Feb	2015-02-09	24	2014	1	14	5	108	0.0462963		0		334
Feb	2015-02-09	24	2014	1	18	7	84	0.0833333		0		335
Feb	2015-02-09	24	2014	1	20	0	22	0		0		336
Feb	2015-02-09	32	2014	1	12	1	102	0.00980392		0		337
Feb	2015-02-09	32	2014	1	14	0	110	0		0		338
Feb	2015-02-09	32	2014	1	18	0	76	0		0		339
Feb	2015-02-09	32	2014	1	20	0	20	0		0		340
Feb	2015-02-09	10	2014	2	12	1	72	0.0138889		0		341
Feb	2015-02-09	10	2014	2	14	1	107	0.00934579		0		342
Feb	2015-02-09	10	2014	2	18	0	62	0		0		343
Feb	2015-02-09	10	2014	2	20	1	32	0.03125		0		344
Feb	2015-02-09	15	2014	2	12	1	79	0.0126582		0		345
Feb	2015-02-09	15	2014	2	14	11	116	0.0948276		0		346
Feb	2015-02-09	15	2014	2	18	3	71	0.0422535		0		347
Feb	2015-02-09	15	2014	2	20	0	26	0		0		348
Feb	2015-02-09	24	2014	2	12	1	101	0.00990099		0		349
Feb	2015-02-09	24	2014	2	14	5	106	0.0471698		0		350
Feb	2015-02-09	24	2014	2	18	2	85	0.0235294		0		351
Feb	2015-02-09	24	2014	2	20	0	41	0		0		352
Feb	2015-02-09	32	2014	2	12	1	87	0.0114943		0		353
Feb	2015-02-09	32	2014	2	14	0	107	0		0		354
Feb	2015-02-09	32	2014	2	18	0	56	0		0		355
Feb	2015-02-09	32	2014	2	20	0	20	0		0		356
Feb	2015-02-09	10	2014	3	12	2	70	0.0285714		0		357
Feb	2015-02-09	10	2014	3	14	0	110	0		0		358
Feb	2015-02-09	10	2014	3	18	1	62	0.016129		0		359
Feb	2015-02-09	10	2014	3	20	0	41	0		0		360
Feb	2015-02-09	15	2014	3	12	3	73	0.0410959		0		361
Feb	2015-02-09	15	2014	3	14	7	95	0.0736842		0		362
Feb	2015-02-09	15	2014	3	18	10	63	0.15873		0		363
Feb	2015-02-09	15	2014	3	20	0	23	0		0		364
Feb	2015-02-09	24	2014	3	12	3	103	0.0291262		0		365
Feb	2015-02-09	24	2014	3	14	7	84	0.0833333		0		366
Feb	2015-02-09	24	2014	3	18	1	73	0.0136986		0		367
Feb	2015-02-09	24	2014	3	20	0	37	0		0		368
Feb	2015-02-09	32	2014	3	12	3	92	0.0326087		0		369
Feb	2015-02-09	32	2014	3	14	0	96	0		0		370
Feb	2015-02-09	32	2014	3	18	1	70	0.0142857		0		371
Feb	2015-02-09	32	2014	3	20	0	25	0		0		372
Feb	2015-02-09	10	2014	4	12	0	74	0		0		373
Feb	2015-02-09	10	2014	4	14	0	108	0		0		374
Feb	2015-02-09	10	2014	4	18	0	66	0		0		375
Feb	2015-02-09	10	2014	4	20	0	27	0		0		376
Feb	2015-02-09	15	2014	4	12	1	85	0.0117647		0		377
Feb	2015-02-09	15	2014	4	14	7	94	0.0744681		0		378
Feb	2015-02-09	15	2014	4	18	3	77	0.038961		0		379
Feb	2015-02-09	15	2014	4	20	2	31	0.0645161		0		380
Feb	2015-02-09	24	2014	4	12	3	95	0.0315789		0		381
Feb	2015-02-09	24	2014	4	14	7	105	0.0666667		0		382
Feb	2015-02-09	24	2014	4	18	5	72	0.0694444		0		383
Feb	2015-02-09	24	2014	4	20	0	38	0		0		384
Feb	2015-02-09	32	2014	4	12	1	108	0.00925926		0		385
Feb	2015-02-09	32	2014	4	14	0	107	0		0		386
Feb	2015-02-09	32	2014	4	18	0	104	0		0		387
Feb	2015-02-09	32	2014	4	20	0	27	0		0		388
Feb	2015-02-09	10	2014	5	12	0	100	0		0		389
Feb	2015-02-09	10	2014	5	14	1	103	0.00970874		0		390
Feb	2015-02-09	10	2014	5	18	0	65	0		0		391
Feb	2015-02-09	10	2014	5	20	0	59	0		0		392
Feb	2015-02-09	15	2014	5	12	2	93	0.0215054		0		393
Feb	2015-02-09	15	2014	5	14	7	100	0.07		0		394
Feb	2015-02-09	15	2014	5	18	5	64	0.078125		0		395
Feb	2015-02-09	15	2014	5	20	1	31	0.0322581		0		396
Feb	2015-02-09	24	2014	5	12	1	85	0.0117647		0		397
Feb	2015-02-09	24	2014	5	14	9	97	0.0927835		0		398
Feb	2015-02-09	24	2014	5	18	6	75	0.08		0		399
Feb	2015-02-09	24	2014	5	20	0	42	0		0		400
Feb	2015-02-09	32	2014	5	12	1	95	0.0105263		0		401
Feb	2015-02-09	32	2014	5	14	0	110	0		0		402
Feb	2015-02-09	32	2014	5	18	0	80	0		0		403
Feb	2015-02-09	32	2014	5	20	0	22	0		0		404
Feb												405
Feb	2015-02-11	10	2014	1	12	2	70	0.0285714		0		406
Feb	2015-02-11	10	2014	1	14	1	104	0.00961538		0		407
Feb	2015-02-11	10	2014	1	18	0	63	0		0		408
Feb	2015-02-11	10	2014	1	20	1	38	0.0263158		0		409
Feb	2015-02-11	15	2014	1	12	1	96	0.0104167		0		410
Feb	2015-02-11	15	2014	1	14	19	108	0.175926		0		411
Feb	2015-02-11	15	2014	1	18	13	75	0.173333		0		412
Feb	2015-02-11	15	2014	1	20	0	21	0		0		413
Feb	2015-02-11	24	2014	1	12	1	89	0.011236		0		414
Feb	2015-02-11	24	2014	1	14	0	108	0		0		415
Feb	2015-02-11	24	2014	1	18	2	84	0.0238095		0		416
Feb	2015-02-11	24	2014	1	20	0	22	0		0		417
Feb	2015-02-11	32	2014	1	12	0	102	0		0		418
Feb	2015-02-11	32	2014	1	14	0	110	0		0		419
Feb	2015-02-11	32	2014	1	18	1	76	0.0131579		0		420
Feb	2015-02-11	32	2014	1	20	0	20	0		0		421
Feb	2015-02-11	10	2014	2	12	0	72	0		0		422
Feb	2015-02-11	10	2014	2	14	0	107	0		0		423
Feb	2015-02-11	10	2014	2	18	0	62	0		0		424
Feb	2015-02-11	10	2014	2	20	1	32	0.03125		0		425
Feb	2015-02-11	15	2014	2	12	0	79	0		0		426
Feb	2015-02-11	15	2014	2	14	17	116	0.146552		0		427
Feb	2015-02-11	15	2014	2	18	5	71	0.0704225		0		428
Feb	2015-02-11	15	2014	2	20	1	26	0.0384615		0		429
Feb	2015-02-11	24	2014	2	12	1	101	0.00990099		0		430
Feb	2015-02-11	24	2014	2	14	2	106	0.0188679		0		431
Feb	2015-02-11	24	2014	2	18	0	85	0		0		432
Feb	2015-02-11	24	2014	2	20	0	41	0		0		433
Feb	2015-02-11	32	2014	2	12	0	87	0		0		434
Feb	2015-02-11	32	2014	2	14	1	107	0.00934579		0		435
Feb	2015-02-11	32	2014	2	18	0	56	0		0		436
Feb	2015-02-11	32	2014	2	20	0	20	0		0		437
Feb	2015-02-11	10	2014	3	12	0	70	0		0		438
Feb	2015-02-11	10	2014	3	14	2	110	0.0181818		0		439
Feb	2015-02-11	10	2014	3	18	0	62	0		0		440
Feb	2015-02-11	10	2014	3	20	1	41	0.0243902		0		441
Feb	2015-02-11	15	2014	3	12	0	73	0		0		442
Feb	2015-02-11	15	2014	3	14	13	95	0.136842		0		443
Feb	2015-02-11	15	2014	3	18	7	63	0.111111		0		444
Feb	2015-02-11	15	2014	3	20	3	23	0.130435		0		445
Feb	2015-02-11	24	2014	3	12	1	103	0.00970874		0		446
Feb	2015-02-11	24	2014	3	14	2	84	0.0238095		0		447
Feb	2015-02-11	24	2014	3	18	1	73	0.0136986		0		448
Feb	2015-02-11	24	2014	3	20	0	37	0		0		449
Feb	2015-02-11	32	2014	3	12	0	92	0		0		450
Feb	2015-02-11	32	2014	3	14	1	96	0.0104167		0		451
Feb	2015-02-11	32	2014	3	18	0	70	0		0		452
Feb	2015-02-11	32	2014	3	20	0	25	0		0		453
Feb	2015-02-11	10	2014	4	12	0	74	0		0		454
Feb	2015-02-11	10	2014	4	14	1	108	0.00925926		0		455
Feb	2015-02-11	10	2014	4	18	0	66	0		0		456
Feb	2015-02-11	10	2014	4	20	2	27	0.0740741		0		457
Feb	2015-02-11	15	2014	4	12	1	85	0.0117647		0		458
Feb	2015-02-11	15	2014	4	14	15	94	0.159574		0		459
Feb	2015-02-11	15	2014	4	18	5	77	0.0649351		0		460
Feb	2015-02-11	15	2014	4	20	0	31	0		0		461
Feb	2015-02-11	24	2014	4	12	0	95	0		0		462
Feb	2015-02-11	24	2014	4	14	4	105	0.0380952		0		463
Feb	2015-02-11	24	2014	4	18	1	72	0.0138889		0		464
Feb	2015-02-11	24	2014	4	20	0	38	0		0		465
Feb	2015-02-11	32	2014	4	12	0	108	0		0		466
Feb	2015-02-11	32	2014	4	14	0	107	0		0		467
Feb	2015-02-11	32	2014	4	18	0	104	0		0		468
Feb	2015-02-11	32	2014	4	20	0	27	0		0		469
Feb	2015-02-11	10	2014	5	12	2	100	0.02		0		470
Feb	2015-02-11	10	2014	5	14	2	103	0.0194175		0		471
Feb	2015-02-11	10	2014	5	18	0	65	0		0		472
Feb	2015-02-11	10	2014	5	20	3	59	0.0508475		0		473
Feb	2015-02-11	15	2014	5	12	0	93	0		0		474
Feb	2015-02-11	15	2014	5	14	14	100	0.14		0		475
Feb	2015-02-11	15	2014	5	18	12	64	0.1875		0		476
Feb	2015-02-11	15	2014	5	20	0	31	0		0		477
Feb	2015-02-11	24	2014	5	12	1	85	0.0117647		0		478
Feb	2015-02-11	24	2014	5	14	4	97	0.0412371		0		479
Feb	2015-02-11	24	2014	5	18	0	75	0		0		480
Feb	2015-02-11	24	2014	5	20	0	42	0		0		481
Feb	2015-02-11	32	2014	5	12	1	95	0.0105263		0		482
Feb	2015-02-11	32	2014	5	14	0	110	0		0		483
Feb	2015-02-11	32	2014	5	18	0	80	0		0		484
Feb	2015-02-11	32	2014	5	20	0	22	0		0		485
Feb												486
Feb	2015-02-13	10	2014	1	12	0	70	0		0		487
Feb	2015-02-13	10	2014	1	14	6	104	0.0576923		0		488
Feb	2015-02-13	10	2014	1	18	4	63	0.0634921		0		489
Feb	2015-02-13	10	2014	1	20	2	38	0.0526316		0		490
Feb	2015-02-13	15	2014	1	12	1	96	0.0104167		0		491
Feb	2015-02-13	15	2014	1	14	17	108	0.157407		0		492
Feb	2015-02-13	15	2014	1	18	9	75	0.12		0		493
Feb	2015-02-13	15	2014	1	20	0	21	0		0		494
Feb	2015-02-13	24	2014	1	12	0	89	0		0		495
Feb	2015-02-13	24	2014	1	14	2	108	0.0185185		0		496
Feb	2015-02-13	24	2014	1	18	2	84	0.0238095		0		497
Feb	2015-02-13	24	2014	1	20	0	22	0		0		498
Feb	2015-02-13	32	2014	1	12	0	102	0		0		499
Feb	2015-02-13	32	2014	1	14	0	110	0		0		500
Feb	2015-02-13	32	2014	1	18	0	76	0		0		501
Feb	2015-02-13	32	2014	1	20	0	20	0		0		502
Feb	2015-02-13	10	2014	2	12	0	72	0		0		503
Feb	2015-02-13	10	2014	2	14	1	107	0.00934579		0		504
Feb	2015-02-13	10	2014	2	18	0	62	0		0		505
Feb	2015-02-13	10	2014	2	20	2	32	0.0625		0		506
Feb	2015-02-13	15	2014	2	12	0	79	0		0		507
Feb	2015-02-13	15	2014	2	14	17	116	0.146552		0		508
Feb	2015-02-13	15	2014	2	18	10	71	0.140845		0		509
Feb	2015-02-13	15	2014	2	20	3	26	0.115385		0		510
Feb	2015-02-13	24	2014	2	12	0	101	0		0		511
Feb	2015-02-13	24	2014	2	14	3	106	0.0283019		0		512
Feb	2015-02-13	24	2014	2	18	1	85	0.0117647		0		513
Feb	2015-02-13	24	2014	2	20	0	41	0		0		514
Feb	2015-02-13	32	2014	2	12	0	87	0		0		515
Feb	2015-02-13	32	2014	2	14	0	107	0		0		516
Feb	2015-02-13	32	2014	2	18	0	56	0		0		517
Feb	2015-02-13	32	2014	2	20	0	20	0		0		518
Feb	2015-02-13	10	2014	3	12	0	70	0		0		519
Feb	2015-02-13	10	2014	3	14	0	110	0		0		520
Feb	2015-02-13	10	2014	3	18	1	62	0.016129		0		521
Feb	2015-02-13	10	2014	3	20	2	41	0.0487805		0		522
Feb	2015-02-13	15	2014	3	12	0	73	0		0		523
Feb	2015-02-13	15	2014	3	14	12	95	0.126316		0		524
Feb	2015-02-13	15	2014	3	18	6	63	0.0952381		0		525
Feb	2015-02-13	15	2014	3	20	2	23	0.0869565		0		526
Feb	2015-02-13	24	2014	3	12	0	103	0		0		527
Feb	2015-02-13	24	2014	3	14	2	84	0.0238095		0		528
Feb	2015-02-13	24	2014	3	18	0	73	0		0		529
Feb	2015-02-13	24	2014	3	20	0	37	0		0		530
Feb	2015-02-13	32	2014	3	12	0	92	0		0		531
Feb	2015-02-13	32	2014	3	14	0	96	0		0		532
Feb	2015-02-13	32	2014	3	18	0	70	0		0		533
Feb	2015-02-13	32	2014	3	20	0	25	0		0		534
Feb	2015-02-13	10	2014	4	12	1	74	0.0135135		0		535
Feb	2015-02-13	10	2014	4	14	1	108	0.00925926		0		536
Feb	2015-02-13	10	2014	4	18	2	66	0.030303		0		537
Feb	2015-02-13	10	2014	4	20	2	27	0.0740741		0		538
Feb	2015-02-13	15	2014	4	12	0	85	0		0		539
Feb	2015-02-13	15	2014	4	14	13	94	0.138298		0		540
Feb	2015-02-13	15	2014	4	18	3	77	0.038961		0		541
Feb	2015-02-13	15	2014	4	20	2	31	0.0645161		0		542
Feb	2015-02-13	24	2014	4	12	0	95	0		0		543
Feb	2015-02-13	24	2014	4	14	5	105	0.047619		0		544
Feb	2015-02-13	24	2014	4	18	0	72	0		0		545
Feb	2015-02-13	24	2014	4	20	0	38	0		0		546
Feb	2015-02-13	32	2014	4	12	0	108	0		0		547
Feb	2015-02-13	32	2014	4	14	0	107	0		0		548
Feb	2015-02-13	32	2014	4	18	0	104	0		0		549
Feb	2015-02-13	32	2014	4	20	0	27	0		0		550
Feb	2015-02-13	10	2014	5	12	0	100	0		0		551
Feb	2015-02-13	10	2014	5	14	0	103	0		0		552
Feb	2015-02-13	10	2014	5	18	1	65	0.0153846		0		553
Feb	2015-02-13	10	2014	5	20	2	59	0.0338983		0		554
Feb	2015-02-13	15	2014	5	12	1	93	0.0107527		0		555
Feb	2015-02-13	15	2014	5	14	12	100	0.12		0		556
Feb	2015-02-13	15	2014	5	18	5	64	0.078125		0		557
Feb	2015-02-13	15	2014	5	20	1	31	0.0322581		0		558
Feb	2015-02-13	24	2014	5	12	0	85	0		0		559
Feb	2015-02-13	24	2014	5	14	1	97	0.0103093		0		560
Feb	2015-02-13	24	2014	5	18	1	75	0.0133333		0		561
Feb	2015-02-13	24	2014	5	20	0	42	0		0		562
Feb	2015-02-13	32	2014	5	12	1	95	0.0105263		0		563
Feb	2015-02-13	32	2014	5	14	0	110	0		0		564
Feb	2015-02-13	32	2014	5	18	0	80	0		0		565
Feb	2015-02-13	32	2014	5	20	0	22	0		0		566
Feb												567
Feb	2015-02-16	10	2014	1	12	0	70	0				568
Feb	2015-02-16	10	2014	1	14	18	104	0.173077				569
Feb	2015-02-16	10	2014	1	18	5	63	0.0793651				570
Feb	2015-02-16	10	2014	1	20	2	38	0.0526316				571
Feb	2015-02-16	15	2014	1	12	0	96	0				572
Feb	2015-02-16	15	2014	1	14	6	108	0.0555556				573
Feb	2015-02-16	15	2014	1	18	6	75	0.08				574
Feb	2015-02-16	15	2014	1	20	2	21	0.0952381				575
Feb	2015-02-16	24	2014	1	12	0	89	0				576
Feb	2015-02-16	24	2014	1	14	1	108	0.00925926				577
Feb	2015-02-16	24	2014	1	18	0	84	0				578
Feb	2015-02-16	24	2014	1	20	0	22	0				579
Feb	2015-02-16	32	2014	1	12	0	102	0				580
Feb	2015-02-16	32	2014	1	14	0	110	0				581
Feb	2015-02-16	32	2014	1	18	0	76	0				582
Feb	2015-02-16	32	2014	1	20	0	20	0				583
Feb	2015-02-16	10	2014	2	12	1	72	0.0138889				584
Feb	2015-02-16	10	2014	2	14	6	107	0.0560748				585
Feb	2015-02-16	10	2014	2	18	5	62	0.0806452				586
Feb	2015-02-16	10	2014	2	20	1	32	0.03125				587
Feb	2015-02-16	15	2014	2	12	0	79	0				588
Feb	2015-02-16	15	2014	2	14	12	116	0.103448				589
Feb	2015-02-16	15	2014	2	18	4	71	0.056338				590
Feb	2015-02-16	15	2014	2	20	0	26	0				591
Feb	2015-02-16	24	2014	2	12	0	101	0				592
Feb	2015-02-16	24	2014	2	14	3	106	0.0283019				593
Feb	2015-02-16	24	2014	2	18	0	85	0				594
Feb	2015-02-16	24	2014	2	20	0	41	0				595
Feb	2015-02-16	32	2014	2	12	0	87	0				596
Feb	2015-02-16	32	2014	2	14	0	107	0				597
Feb	2015-02-16	32	2014	2	18	0	56	0				598
Feb	2015-02-16	32	2014	2	20	0	20	0				599
Feb	2015-02-16	10	2014	3	12	0	70	0				600
Feb	2015-02-16	10	2014	3	14	7	110	0.0636364				601
Feb	2015-02-16	10	2014	3	18	2	62	0.0322581				602
Feb	2015-02-16	10	2014	3	20	2	41	0.0487805				603
Feb	2015-02-16	15	2014	3	12	1	73	0.0136986				604
Feb	2015-02-16	15	2014	3	14	12	95	0.126316				605
Feb	2015-02-16	15	2014	3	18	7	63	0.111111				606
Feb	2015-02-16	15	2014	3	20	1	23	0.0434783				607
Feb	2015-02-16	24	2014	3	12	0	103	0				608
Feb	2015-02-16	24	2014	3	14	3	84	0.0357143				609
Feb	2015-02-16	24	2014	3	18	0	73	0				610
Feb	2015-02-16	24	2014	3	20	0	37	0				611
Feb	2015-02-16	32	2014	3	12	1	92	0.0108696				612
Feb	2015-02-16	32	2014	3	14	0	96	0				613
Feb	2015-02-16	32	2014	3	18	0	70	0				614
Feb	2015-02-16	32	2014	3	20	0	25	0				615
Feb	2015-02-16	10	2014	4	12	0	74	0				616
Feb	2015-02-16	10	2014	4	14	6	108	0.0555556				617
Feb	2015-02-16	10	2014	4	18	3	66	0.0454545				618
Feb	2015-02-16	10	2014	4	20	2	27	0.0740741				619
Feb	2015-02-16	15	2014	4	12	4	85	0.0470588				620
Feb	2015-02-16	15	2014	4	14	13	94	0.138298				621
Feb	2015-02-16	15	2014	4	18	5	77	0.0649351				622
Feb	2015-02-16	15	2014	4	20	0	31	0				623
Feb	2015-02-16	24	2014	4	12	0	95	0				624
Feb	2015-02-16	24	2014	4	14	2	105	0.0190476				625
Feb	2015-02-16	24	2014	4	18	0	72	0				626
Feb	2015-02-16	24	2014	4	20	0	38	0				627
Feb	2015-02-16	32	2014	4	12	0	108	0				628
Feb	2015-02-16	32	2014	4	14	0	107	0				629
Feb	2015-02-16	32	2014	4	18	0	104	0				630
Feb	2015-02-16	32	2014	4	20	0	27	0				631
Feb	2015-02-16	10	2014	5	12	0	100	0				632
Feb	2015-02-16	10	2014	5	14	3	103	0.0291262				633
Feb	2015-02-16	10	2014	5	18	1	65	0.0153846				634
Feb	2015-02-16	10	2014	5	20	4	59	0.0677966				635
Feb	2015-02-16	15	2014	5	12	1	93	0.0107527				636
Feb	2015-02-16	15	2014	5	14	11	100	0.11				637
Feb	2015-02-16	15	2014	5	18	3	64	0.046875				638
Feb	2015-02-16	15	2014	5	20	1	31	0.0322581				639
Feb	2015-02-16	24	2014	5	12	1	85	0.0117647				640
Feb	2015-02-16	24	2014	5	14	2	97	0.0206186				641
Feb	2015-02-16	24	2014	5	18	1	75	0.0133333				642
Feb	2015-02-16	24	2014	5	20	0	42	0				643
Feb	2015-02-16	32	2014	5	12	0	95	0				644
Feb	2015-02-16	32	2014	5	14	0	110	0				645
Feb	2015-02-16	32	2014	5	18	0	80	0				646
Feb	2015-02-16	32	2014	5	20	0	22	0				647
Feb												648
Feb	2015-02-18	10	2014	1	12	0	70	0				649
Feb	2015-02-18	10	2014	1	14	7	104	0.0673077				650
Feb	2015-02-18	10	2014	1	18	4	63	0.0634921				651
Feb	2015-02-18	10	2014	1	20	1	38	0.0263158				652
Feb	2015-02-18	15	2014	1	12	0	96	0				653
Feb	2015-02-18	15	2014	1	14	6	108	0.0555556				654
Feb	2015-02-18	15	2014	1	18	4	75	0.0533333				655
Feb	2015-02-18	15	2014	1	20	1	21	0.047619				656
Feb	2015-02-18	24	2014	1	12	0	89	0				657
Feb	2015-02-18	24	2014	1	14	1	108	0.00925926				658
Feb	2015-02-18	24	2014	1	18	0	84	0				659
Feb	2015-02-18	24	2014	1	20	0	22	0				660
Feb	2015-02-18	32	2014	1	12	0	102	0				661
Feb	2015-02-18	32	2014	1	14	0	110	0				662
Feb	2015-02-18	32	2014	1	18	0	76	0				663
Feb	2015-02-18	32	2014	1	20	0	20	0				664
Feb	2015-02-18	10	2014	2	12	1	72	0.0138889				665
Feb	2015-02-18	10	2014	2	14	9	107	0.0841121				666
Feb	2015-02-18	10	2014	2	18	6	62	0.0967742				667
Feb	2015-02-18	10	2014	2	20	0	32	0				668
Feb	2015-02-18	15	2014	2	12	0	79	0				669
Feb	2015-02-18	15	2014	2	14	7	116	0.0603448				670
Feb	2015-02-18	15	2014	2	18	2	71	0.028169				671
Feb	2015-02-18	15	2014	2	20	1	26	0.0384615				672
Feb	2015-02-18	24	2014	2	12	0	101	0				673
Feb	2015-02-18	24	2014	2	14	1	106	0.00943396				674
Feb	2015-02-18	24	2014	2	18	0	85	0				675
Feb	2015-02-18	24	2014	2	20	0	41	0				676
Feb	2015-02-18	32	2014	2	12	0	87	0				677
Feb	2015-02-18	32	2014	2	14	0	107	0				678
Feb	2015-02-18	32	2014	2	18	0	56	0				679
Feb	2015-02-18	32	2014	2	20	0	20	0				680
Feb	2015-02-18	10	2014	3	12	0	70	0				681
Feb	2015-02-18	10	2014	3	14	7	110	0.0636364				682
Feb	2015-02-18	10	2014	3	18	2	62	0.0322581				683
Feb	2015-02-18	10	2014	3	20	2	41	0.0487805				684
Feb	2015-02-18	15	2014	3	12	0	73	0				685
Feb	2015-02-18	15	2014	3	14	4	95	0.0421053				686
Feb	2015-02-18	15	2014	3	18	1	63	0.015873				687
Feb	2015-02-18	15	2014	3	20	0	23	0				688
Feb	2015-02-18	24	2014	3	12	1	103	0.00970874				689
Feb	2015-02-18	24	2014	3	14	0	84	0				690
Feb	2015-02-18	24	2014	3	18	0	73	0				691
Feb	2015-02-18	24	2014	3	20	0	37	0				692
Feb	2015-02-18	32	2014	3	12	0	92	0				693
Feb	2015-02-18	32	2014	3	14	0	96	0				694
Feb	2015-02-18	32	2014	3	18	0	70	0				695
Feb	2015-02-18	32	2014	3	20	1	25	0.04				696
Feb	2015-02-18	10	2014	4	12	0	74	0				697
Feb	2015-02-18	10	2014	4	14	2	108	0.0185185				698
Feb	2015-02-18	10	2014	4	18	5	66	0.0757576				699
Feb	2015-02-18	10	2014	4	20	2	27	0.0740741				700
Feb	2015-02-18	15	2014	4	12	0	85	0				701
Feb	2015-02-18	15	2014	4	14	8	94	0.0851064				702
Feb	2015-02-18	15	2014	4	18	4	77	0.0519481				703
Feb	2015-02-18	15	2014	4	20	0	31	0				704
Feb	2015-02-18	24	2014	4	12	0	95	0				705
Feb	2015-02-18	24	2014	4	14	0	105	0				706
Feb	2015-02-18	24	2014	4	18	0	72	0				707
Feb	2015-02-18	24	2014	4	20	0	38	0				708
Feb	2015-02-18	32	2014	4	12	1	108	0.00925926				709
Feb	2015-02-18	32	2014	4	14	0	107	0				710
Feb	2015-02-18	32	2014	4	18	0	104	0				711
Feb	2015-02-18	32	2014	4	20	0	27	0				712
Feb	2015-02-18	10	2014	5	12	0	100	0				713
Feb	2015-02-18	10	2014	5	14	5	103	0.0485437				714
Feb	2015-02-18	10	2014	5	18	2	65	0.0307692				715
Feb	2015-02-18	10	2014	5	20	2	59	0.0338983				716
Feb	2015-02-18	15	2014	5	12	3	93	0.0322581				717
Feb	2015-02-18	15	2014	5	14	6	100	0.06				718
Feb	2015-02-18	15	2014	5	18	1	64	0.015625				719
Feb	2015-02-18	15	2014	5	20	1	31	0.0322581				720
Feb	2015-02-18	24	2014	5	12	0	85	0				721
Feb	2015-02-18	24	2014	5	14	0	97	0				722
Feb	2015-02-18	24	2014	5	18	3	75	0.04				723
Feb	2015-02-18	24	2014	5	20	0	42	0				724
Feb	2015-02-18	32	2014	5	12	0	95	0				725
Feb	2015-02-18	32	2014	5	14	0	110	0				726
Feb	2015-02-18	32	2014	5	18	0	80	0				727
Feb	2015-02-18	32	2014	5	20	0	22	0				728
Feb												729
Feb	2015-02-20	10	2014	1	12	1	70	0.0142857				730
Feb	2015-02-20	10	2014	1	14	4	104	0.0384615				731
Feb	2015-02-20	10	2014	1	18	1	63	0.015873				732
Feb	2015-02-20	10	2014	1	20	0	38	0				733
Feb	2015-02-20	15	2014	1	12	1	96	0.0104167				734
Feb	2015-02-20	15	2014	1	14	0	108	0				735
Feb	2015-02-20	15	2014	1	18	0	75	0				736
Feb	2015-02-20	15	2014	1	20	0	21	0				737
Feb	2015-02-20	24	2014	1	12	0	89	0				738
Feb	2015-02-20	24	2014	1	14	0	108	0				739
Feb	2015-02-20	24	2014	1	18	0	84	0				740
Feb	2015-02-20	24	2014	1	20	0	22	0				741
Feb	2015-02-20	32	2014	1	12	0	102	0				742
Feb	2015-02-20	32	2014	1	14	0	110	0				743
Feb	2015-02-20	32	2014	1	18	0	76	0				744
Feb	2015-02-20	32	2014	1	20	1	20	0.05				745
Feb	2015-02-20	10	2014	2	12	0	72	0				746
Feb	2015-02-20	10	2014	2	14	12	107	0.11215				747
Feb	2015-02-20	10	2014	2	18	2	62	0.0322581				748
Feb	2015-02-20	10	2014	2	20	1	32	0.03125				749
Feb	2015-02-20	15	2014	2	12	0	79	0				750
Feb	2015-02-20	15	2014	2	14	5	116	0.0431034				751
Feb	2015-02-20	15	2014	2	18	1	71	0.0140845				752
Feb	2015-02-20	15	2014	2	20	0	26	0				753
Feb	2015-02-20	24	2014	2	12	1	101	0.00990099				754
Feb	2015-02-20	24	2014	2	14	1	106	0.00943396				755
Feb	2015-02-20	24	2014	2	18	0	85	0				756
Feb	2015-02-20	24	2014	2	20	0	41	0				757
Feb	2015-02-20	32	2014	2	12	0	87	0				758
Feb	2015-02-20	32	2014	2	14	0	107	0				759
Feb	2015-02-20	32	2014	2	18	0	56	0				760
Feb	2015-02-20	32	2014	2	20	0	20	0				761
Feb	2015-02-20	10	2014	3	12	0	70	0				762
Feb	2015-02-20	10	2014	3	14	10	110	0.0909091				763
Feb	2015-02-20	10	2014	3	18	1	62	0.016129				764
Feb	2015-02-20	10	2014	3	20	0	41	0				765
Feb	2015-02-20	15	2014	3	12	1	73	0.0136986				766
Feb	2015-02-20	15	2014	3	14	6	95	0.0631579				767
Feb	2015-02-20	15	2014	3	18	1	63	0.015873				768
Feb	2015-02-20	15	2014	3	20	1	23	0.0434783				769
Feb	2015-02-20	24	2014	3	12	1	103	0.00970874				770
Feb	2015-02-20	24	2014	3	14	0	84	0				771
Feb	2015-02-20	24	2014	3	18	0	73	0				772
Feb	2015-02-20	24	2014	3	20	0	37	0				773
Feb	2015-02-20	32	2014	3	12	0	92	0				774
Feb	2015-02-20	32	2014	3	14	0	96	0				775
Feb	2015-02-20	32	2014	3	18	0	70	0				776
Feb	2015-02-20	32	2014	3	20	0	25	0				777
Feb	2015-02-20	10	2014	4	12	0	74	0				778
Feb	2015-02-20	10	2014	4	14	9	108	0.0833333				779
Feb	2015-02-20	10	2014	4	18	4	66	0.0606061				780
Feb	2015-02-20	10	2014	4	20	4	27	0.148148				781
Feb	2015-02-20	15	2014	4	12	0	85	0				782
Feb	2015-02-20	15	2014	4	14	3	94	0.0319149				783
Feb	2015-02-20	15	2014	4	18	2	77	0.025974				784
Feb	2015-02-20	15	2014	4	20	0	31	0				785
Feb	2015-02-20	24	2014	4	12	0	95	0				786
Feb	2015-02-20	24	2014	4	14	0	105	0				787
Feb	2015-02-20	24	2014	4	18	0	72	0				788
Feb	2015-02-20	24	2014	4	20	0	38	0				789
Feb	2015-02-20	32	2014	4	12	0	108	0				790
Feb	2015-02-20	32	2014	4	14	0	107	0				791
Feb	2015-02-20	32	2014	4	18	0	104	0				792
Feb	2015-02-20	32	2014	4	20	0	27	0				793
Feb	2015-02-20	10	2014	5	12	0	100	0				794
Feb	2015-02-20	10	2014	5	14	5	103	0.0485437				795
Feb	2015-02-20	10	2014	5	18	8	65	0.123077				796
Feb	2015-02-20	10	2014	5	20	1	59	0.0169492				797
Feb	2015-02-20	15	2014	5	12	1	93	0.0107527				798
Feb	2015-02-20	15	2014	5	14	3	100	0.03				799
Feb	2015-02-20	15	2014	5	18	0	64	0				800
Feb	2015-02-20	15	2014	5	20	0	31	0				801
Feb	2015-02-20	24	2014	5	12	0	85	0				802
Feb	2015-02-20	24	2014	5	14	1	97	0.0103093				803
Feb	2015-02-20	24	2014	5	18	0	75	0				804
Feb	2015-02-20	24	2014	5	20	0	42	0				805
Feb	2015-02-20	32	2014	5	12	1	95	0.0105263				806
Feb	2015-02-20	32	2014	5	14	0	110	0				807
Feb	2015-02-20	32	2014	5	18	0	80	0				808
Feb	2015-02-20	32	2014	5	20	0	22	0				809
Feb												810
Feb	2015-02-23	10	2014	1	12	0	70	0				811
Feb	2015-02-23	10	2014	1	14	6	104	0.0576923				812
Feb	2015-02-23	10	2014	1	18	3	63	0.047619				813
Feb	2015-02-23	10	2014	1	20	3	38	0.0789474				814
Feb	2015-02-23	15	2014	1	12	0	96	0				815
Feb	2015-02-23	15	2014	1	14	5	108	0.0462963				816
Feb	2015-02-23	15	2014	1	18	1	75	0.0133333				817
Feb	2015-02-23	15	2014	1	20	0	21	0				818
Feb	2015-02-23	24	2014	1	12	0	89	0				819
Feb	2015-02-23	24	2014	1	14	0	108	0				820
Feb	2015-02-23	24	2014	1	18	0	84	0				821
Feb	2015-02-23	24	2014	1	20	0	22	0				822
Feb	2015-02-23	32	2014	1	12	0	102	0				823
Feb	2015-02-23	32	2014	1	14	0	110	0				824
Feb	2015-02-23	32	2014	1	18	0	76	0				825
Feb	2015-02-23	32	2014	1	20	0	20	0				826
Feb	2015-02-23	10	2014	2	12	0	72	0				827
Feb	2015-02-23	10	2014	2	14	11	107	0.102804				828
Feb	2015-02-23	10	2014	2	18	3	62	0.0483871				829
Feb	2015-02-23	10	2014	2	20	2	32	0.0625				830
Feb	2015-02-23	15	2014	2	12	0	79	0				831
Feb	2015-02-23	15	2014	2	14	2	116	0.0172414				832
Feb	2015-02-23	15	2014	2	18	1	71	0.0140845				833
Feb	2015-02-23	15	2014	2	20	1	26	0.0384615				834
Feb	2015-02-23	24	2014	2	12	0	101	0				835
Feb	2015-02-23	24	2014	2	14	0	106	0				836
Feb	2015-02-23	24	2014	2	18	0	85	0				837
Feb	2015-02-23	24	2014	2	20	0	41	0				838
Feb	2015-02-23	32	2014	2	12	0	87	0				839
Feb	2015-02-23	32	2014	2	14	0	107	0				840
Feb	2015-02-23	32	2014	2	18	0	56	0				841
Feb	2015-02-23	32	2014	2	20	0	20	0				842
Feb	2015-02-23	10	2014	3	12	0	70	0				843
Feb	2015-02-23	10	2014	3	14	15	110	0.136364				844
Feb	2015-02-23	10	2014	3	18	4	62	0.0645161				845
Feb	2015-02-23	10	2014	3	20	2	41	0.0487805				846
Feb	2015-02-23	15	2014	3	12	1	73	0.0136986				847
Feb	2015-02-23	15	2014	3	14	2	95	0.0210526				848
Feb	2015-02-23	15	2014	3	18	1	63	0.015873				849
Feb	2015-02-23	15	2014	3	20	0	23	0				850
Feb	2015-02-23	24	2014	3	12	0	103	0				851
Feb	2015-02-23	24	2014	3	14	0	84	0				852
Feb	2015-02-23	24	2014	3	18	0	73	0				853
Feb	2015-02-23	24	2014	3	20	0	37	0				854
Feb	2015-02-23	32	2014	3	12	0	92	0				855
Feb	2015-02-23	32	2014	3	14	0	96	0				856
Feb	2015-02-23	32	2014	3	18	0	70	0				857
Feb	2015-02-23	32	2014	3	20	0	25	0				858
Feb	2015-02-23	10	2014	4	12	0	74	0				859
Feb	2015-02-23	10	2014	4	14	4	108	0.037037				860
Feb	2015-02-23	10	2014	4	18	5	66	0.0757576				861
Feb	2015-02-23	10	2014	4	20	2	27	0.0740741				862
Feb	2015-02-23	15	2014	4	12	1	85	0.0117647				863
Feb	2015-02-23	15	2014	4	14	3	94	0.0319149				864
Feb	2015-02-23	15	2014	4	18	2	77	0.025974				865
Feb	2015-02-23	15	2014	4	20	1	31	0.0322581				866
Feb	2015-02-23	24	2014	4	12	0	95	0				867
Feb	2015-02-23	24	2014	4	14	0	105	0				868
Feb	2015-02-23	24	2014	4	18	0	72	0				869
Feb	2015-02-23	24	2014	4	20	1	38	0.0263158				870
Feb	2015-02-23	32	2014	4	12	0	108	0				871
Feb	2015-02-23	32	2014	4	14	0	107	0				872
Feb	2015-02-23	32	2014	4	18	0	104	0				873
Feb	2015-02-23	32	2014	4	20	0	27	0				874
Feb	2015-02-23	10	2014	5	12	0	100	0				875
Feb	2015-02-23	10	2014	5	14	13	103	0.126214				876
Feb	2015-02-23	10	2014	5	18	5	65	0.0769231				877
Feb	2015-02-23	10	2014	5	20	3	59	0.0508475				878
Feb	2015-02-23	15	2014	5	12	1	93	0.0107527				879
Feb	2015-02-23	15	2014	5	14	5	100	0.05				880
Feb	2015-02-23	15	2014	5	18	0	64	0				881
Feb	2015-02-23	15	2014	5	20	1	31	0.0322581				882
Feb	2015-02-23	24	2014	5	12	0	85	0				883
Feb	2015-02-23	24	2014	5	14	0	97	0				884
Feb	2015-02-23	24	2014	5	18	0	75	0				885
Feb	2015-02-23	24	2014	5	20	0	42	0				886
Feb	2015-02-23	32	2014	5	12	0	95	0				887
Feb	2015-02-23	32	2014	5	14	0	110	0				888
Feb	2015-02-23	32	2014	5	18	0	80	0				889
Feb	2015-02-23	32	2014	5	20	0	22	0				890
Feb												891
Feb	2015-02-25	10	2014	1	12	0	70	0				892
Feb	2015-02-25	10	2014	1	14	9	104	0.0865385				893
Feb	2015-02-25	10	2014	1	18	2	63	0.031746				894
Feb	2015-02-25	10	2014	1	20	1	38	0.0263158				895
Feb	2015-02-25	15	2014	1	12	1	96	0.0104167				896
Feb	2015-02-25	15	2014	1	14	3	108	0.0277778				897
Feb	2015-02-25	15	2014	1	18	2	75	0.0266667				898
Feb	2015-02-25	15	2014	1	20	1	21	0.047619				899
Feb	2015-02-25	24	2014	1	12	0	89	0				900
Feb	2015-02-25	24	2014	1	14	0	108	0				901
Feb	2015-02-25	24	2014	1	18	0	84	0				902
Feb	2015-02-25	24	2014	1	20	0	22	0				903
Feb	2015-02-25	32	2014	1	12	0	102	0				904
Feb	2015-02-25	32	2014	1	14	0	110	0				905
Feb	2015-02-25	32	2014	1	18	0	76	0				906
Feb	2015-02-25	32	2014	1	20	0	20	0				907
Feb	2015-02-25	10	2014	2	12	0	72	0				908
Feb	2015-02-25	10	2014	2	14	6	107	0.0560748				909
Feb	2015-02-25	10	2014	2	18	4	62	0.0645161				910
Feb	2015-02-25	10	2014	2	20	1	32	0.03125				911
Feb	2015-02-25	15	2014	2	12	3	79	0.0379747				912
Feb	2015-02-25	15	2014	2	14	1	116	0.00862069				913
Feb	2015-02-25	15	2014	2	18	0	71	0				914
Feb	2015-02-25	15	2014	2	20	0	26	0				915
Feb	2015-02-25	24	2014	2	12	0	101	0				916
Feb	2015-02-25	24	2014	2	14	0	106	0				917
Feb	2015-02-25	24	2014	2	18	0	85	0				918
Feb	2015-02-25	24	2014	2	20	0	41	0				919
Feb	2015-02-25	32	2014	2	12	0	87	0				920
Feb	2015-02-25	32	2014	2	14	0	107	0				921
Feb	2015-02-25	32	2014	2	18	0	56	0				922
Feb	2015-02-25	32	2014	2	20	0	20	0				923
Feb	2015-02-25	10	2014	3	12	0	70	0				924
Feb	2015-02-25	10	2014	3	14	4	110	0.0363636				925
Feb	2015-02-25	10	2014	3	18	2	62	0.0322581				926
Feb	2015-02-25	10	2014	3	20	2	41	0.0487805				927
Feb	2015-02-25	15	2014	3	12	0	73	0				928
Feb	2015-02-25	15	2014	3	14	5	95	0.0526316				929
Feb	2015-02-25	15	2014	3	18	1	63	0.015873				930
Feb	2015-02-25	15	2014	3	20	0	23	0				931
Feb	2015-02-25	24	2014	3	12	0	103	0				932
Feb	2015-02-25	24	2014	3	14	0	84	0				933
Feb	2015-02-25	24	2014	3	18	1	73	0.0136986				934
Feb	2015-02-25	24	2014	3	20	1	37	0.027027				935
Feb	2015-02-25	32	2014	3	12	0	92	0				936
Feb	2015-02-25	32	2014	3	14	0	96	0				937
Feb	2015-02-25	32	2014	3	18	0	70	0				938
Feb	2015-02-25	32	2014	3	20	0	25	0				939
Feb	2015-02-25	10	2014	4	12	0	74	0				940
Feb	2015-02-25	10	2014	4	14	13	108	0.12037				941
Feb	2015-02-25	10	2014	4	18	1	66	0.0151515				942
Feb	2015-02-25	10	2014	4	20	2	27	0.0740741				943
Feb	2015-02-25	15	2014	4	12	2	85	0.0235294				944
Feb	2015-02-25	15	2014	4	14	4	94	0.0425532				945
Feb	2015-02-25	15	2014	4	18	1	77	0.012987				946
Feb	2015-02-25	15	2014	4	20	1	31	0.0322581				947
Feb	2015-02-25	24	2014	4	12	0	95	0				948
Feb	2015-02-25	24	2014	4	14	0	105	0				949
Feb	2015-02-25	24	2014	4	18	0	72	0				950
Feb	2015-02-25	24	2014	4	20	0	38	0				951
Feb	2015-02-25	32	2014	4	12	0	108	0				952
Feb	2015-02-25	32	2014	4	14	0	107	0				953
Feb	2015-02-25	32	2014	4	18	0	104	0				954
Feb	2015-02-25	32	2014	4	20	0	27	0				955
Feb	2015-02-25	10	2014	5	12	0	100	0				956
Feb	2015-02-25	10	2014	5	14	10	103	0.0970874				957
Feb	2015-02-25	10	2014	5	18	3	65	0.0461538				958
Feb	2015-02-25	10	2014	5	20	0	59	0				959
Feb	2015-02-25	15	2014	5	12	0	93	0				960
Feb	2015-02-25	15	2014	5	14	0	100	0				961
Feb	2015-02-25	15	2014	5	18	3	64	0.046875				962
Feb	2015-02-25	15	2014	5	20	2	31	0.0645161				963
Feb	2015-02-25	24	2014	5	12	0	85	0				964
Feb	2015-02-25	24	2014	5	14	0	97	0				965
Feb	2015-02-25	24	2014	5	18	0	75	0				966
Feb	2015-02-25	24	2014	5	20	0	42	0				967
Feb	2015-02-25	32	2014	5	12	0	95	0				968
Feb	2015-02-25	32	2014	5	14	0	110	0				969
Feb	2015-02-25	32	2014	5	18	0	80	0				970
Feb	2015-02-25	32	2014	5	20	0	22	0				971
Feb												972
Feb	2015-02-27	10	2014	1	12	1	70	0.0142857				973
Feb	2015-02-27	10	2014	1	14	4	104	0.0384615				974
Feb	2015-02-27	10	2014	1	18	0	63	0				975
Feb	2015-02-27	10	2014	1	20	0	38	0				976
Feb	2015-02-27	15	2014	1	12	0	96	0				977
Feb	2015-02-27	15	2014	1	14	4	108	0.037037				978
Feb	2015-02-27	15	2014	1	18	1	75	0.0133333				979
Feb	2015-02-27	15	2014	1	20	0	21	0				980
Feb	2015-02-27	24	2014	1	12	0	89	0				981
Feb	2015-02-27	24	2014	1	14	0	108	0				982
Feb	2015-02-27	24	2014	1	18	1	84	0.0119048				983
Feb	2015-02-27	24	2014	1	20	0	22	0				984
Feb	2015-02-27	32	2014	1	12	0	102	0				985
Feb	2015-02-27	32	2014	1	14	0	110	0				986
Feb	2015-02-27	32	2014	1	18	0	76	0				987
Feb	2015-02-27	32	2014	1	20	0	20	0				988
Feb	2015-02-27	10	2014	2	12	0	72	0				989
Feb	2015-02-27	10	2014	2	14	6	107	0.0560748				990
Feb	2015-02-27	10	2014	2	18	0	62	0				991
Feb	2015-02-27	10	2014	2	20	1	32	0.03125				992
Feb	2015-02-27	15	2014	2	12	1	79	0.0126582				993
Feb	2015-02-27	15	2014	2	14	2	116	0.0172414				994
Feb	2015-02-27	15	2014	2	18	2	71	0.028169				995
Feb	2015-02-27	15	2014	2	20	1	26	0.0384615				996
Feb	2015-02-27	24	2014	2	12	0	101	0				997
Feb	2015-02-27	24	2014	2	14	0	106	0				998
Feb	2015-02-27	24	2014	2	18	0	85	0				999
Feb	2015-02-27	24	2014	2	20	1	41	0.0243902				1000
Feb	2015-02-27	32	2014	2	12	0	87	0				1001
Feb	2015-02-27	32	2014	2	14	0	107	0				1002
Feb	2015-02-27	32	2014	2	18	0	56	0				1003
Feb	2015-02-27	32	2014	2	20	0	20	0				1004
Feb	2015-02-27	10	2014	3	12	0	70	0				1005
Feb	2015-02-27	10	2014	3	14	3	110	0.0272727				1006
Feb	2015-02-27	10	2014	3	18	1	62	0.016129				1007
Feb	2015-02-27	10	2014	3	20	4	41	0.097561				1008
Feb	2015-02-27	15	2014	3	12	1	73	0.0136986				1009
Feb	2015-02-27	15	2014	3	14	1	95	0.0105263				1010
Feb	2015-02-27	15	2014	3	18	2	63	0.031746				1011
Feb	2015-02-27	15	2014	3	20	1	23	0.0434783				1012
Feb	2015-02-27	24	2014	3	12	0	103	0				1013
Feb	2015-02-27	24	2014	3	14	0	84	0				1014
Feb	2015-02-27	24	2014	3	18	0	73	0				1015
Feb	2015-02-27	24	2014	3	20	0	37	0				1016
Feb	2015-02-27	32	2014	3	12	0	92	0				1017
Feb	2015-02-27	32	2014	3	14	0	96	0				1018
Feb	2015-02-27	32	2014	3	18	0	70	0				1019
Feb	2015-02-27	32	2014	3	20	0	25	0				1020
Feb	2015-02-27	10	2014	4	12	0	74	0				1021
Feb	2015-02-27	10	2014	4	14	3	108	0.0277778				1022
Feb	2015-02-27	10	2014	4	18	4	66	0.0606061				1023
Feb	2015-02-27	10	2014	4	20	1	27	0.037037				1024
Feb	2015-02-27	15	2014	4	12	1	85	0.0117647				1025
Feb	2015-02-27	15	2014	4	14	3	94	0.0319149				1026
Feb	2015-02-27	15	2014	4	18	0	77	0				1027
Feb	2015-02-27	15	2014	4	20	0	31	0				1028
Feb	2015-02-27	24	2014	4	12	0	95	0				1029
Feb	2015-02-27	24	2014	4	14	0	105	0				1030
Feb	2015-02-27	24	2014	4	18	0	72	0				1031
Feb	2015-02-27	24	2014	4	20	0	38	0				1032
Feb	2015-02-27	32	2014	4	12	0	108	0				1033
Feb	2015-02-27	32	2014	4	14	0	107	0				1034
Feb	2015-02-27	32	2014	4	18	0	104	0				1035
Feb	2015-02-27	32	2014	4	20	0	27	0				1036
Feb	2015-02-27	10	2014	5	12	0	100	0				1037
Feb	2015-02-27	10	2014	5	14	9	103	0.0873786				1038
Feb	2015-02-27	10	2014	5	18	3	65	0.0461538				1039
Feb	2015-02-27	10	2014	5	20	1	59	0.0169492				1040
Feb	2015-02-27	15	2014	5	12	1	93	0.0107527				1041
Feb	2015-02-27	15	2014	5	14	1	100	0.01				1042
Feb	2015-02-27	15	2014	5	18	1	64	0.015625				1043
Feb	2015-02-27	15	2014	5	20	0	31	0				1044
Feb	2015-02-27	24	2014	5	12	0	85	0				1045
Feb	2015-02-27	24	2014	5	14	0	97	0				1046
Feb	2015-02-27	24	2014	5	18	0	75	0				1047
Feb	2015-02-27	24	2014	5	20	2	42	0.047619				1048
Feb	2015-02-27	32	2014	5	12	1	95	0.0105263				1049
Feb	2015-02-27	32	2014	5	14	0	110	0				1050
Feb	2015-02-27	32	2014	5	18	0	80	0				1051
Feb	2015-02-27	32	2014	5	20	0	22	0				1052
Feb												1053
Feb	2015-03-02	10	2014	1	12	2	70	0.0285714				1054
Feb	2015-03-02	10	2014	1	14	3	104	0.0288462				1055
Feb	2015-03-02	10	2014	1	18	1	63	0.015873				1056
Feb	2015-03-02	10	2014	1	20	3	38	0.0789474				1057
Feb	2015-03-02	15	2014	1	12	0	96	0				1058
Feb	2015-03-02	15	2014	1	14	2	108	0.0185185				1059
Feb	2015-03-02	15	2014	1	18	1	75	0.0133333				1060
Feb	2015-03-02	15	2014	1	20	1	21	0.047619				1061
Feb	2015-03-02	24	2014	1	12	0	89	0				1062
Feb	2015-03-02	24	2014	1	14	0	108	0				1063
Feb	2015-03-02	24	2014	1	18	1	84	0.0119048				1064
Feb	2015-03-02	24	2014	1	20	0	22	0				1065
Feb	2015-03-02	32	2014	1	12	0	102	0				1066
Feb	2015-03-02	32	2014	1	14	0	110	0				1067
Feb	2015-03-02	32	2014	1	18	0	76	0				1068
Feb	2015-03-02	32	2014	1	20	0	20	0				1069
Feb	2015-03-02	10	2014	2	12	0	72	0				1070
Feb	2015-03-02	10	2014	2	14	5	107	0.046729				1071
Feb	2015-03-02	10	2014	2	18	2	62	0.0322581				1072
Feb	2015-03-02	10	2014	2	20	0	32	0				1073
Feb	2015-03-02	15	2014	2	12	0	79	0				1074
Feb	2015-03-02	15	2014	2	14	1	116	0.00862069				1075
Feb	2015-03-02	15	2014	2	18	0	71	0				1076
Feb	2015-03-02	15	2014	2	20	0	26	0				1077
Feb	2015-03-02	24	2014	2	12	0	101	0				1078
Feb	2015-03-02	24	2014	2	14	1	106	0.00943396				1079
Feb	2015-03-02	24	2014	2	18	0	85	0				1080
Feb	2015-03-02	24	2014	2	20	0	41	0				1081
Feb	2015-03-02	32	2014	2	12	0	87	0				1082
Feb	2015-03-02	32	2014	2	14	0	107	0				1083
Feb	2015-03-02	32	2014	2	18	0	56	0				1084
Feb	2015-03-02	32	2014	2	20	0	20	0				1085
Feb	2015-03-02	10	2014	3	12	2	70	0.0285714				1086
Feb	2015-03-02	10	2014	3	14	5	110	0.0454545				1087
Feb	2015-03-02	10	2014	3	18	1	62	0.016129				1088
Feb	2015-03-02	10	2014	3	20	1	41	0.0243902				1089
Feb	2015-03-02	15	2014	3	12	1	73	0.0136986				1090
Feb	2015-03-02	15	2014	3	14	0	95	0				1091
Feb	2015-03-02	15	2014	3	18	0	63	0				1092
Feb	2015-03-02	15	2014	3	20	0	23	0				1093
Feb	2015-03-02	24	2014	3	12	0	103	0				1094
Feb	2015-03-02	24	2014	3	14	0	84	0				1095
Feb	2015-03-02	24	2014	3	18	0	73	0				1096
Feb	2015-03-02	24	2014	3	20	0	37	0				1097
Feb	2015-03-02	32	2014	3	12	0	92	0				1098
Feb	2015-03-02	32	2014	3	14	0	96	0				1099
Feb	2015-03-02	32	2014	3	18	0	70	0				1100
Feb	2015-03-02	32	2014	3	20	0	25	0				1101
Feb	2015-03-02	10	2014	4	12	0	74	0				1102
Feb	2015-03-02	10	2014	4	14	6	108	0.0555556				1103
Feb	2015-03-02	10	2014	4	18	2	66	0.030303				1104
Feb	2015-03-02	10	2014	4	20	1	27	0.037037				1105
Feb	2015-03-02	15	2014	4	12	0	85	0				1106
Feb	2015-03-02	15	2014	4	14	1	94	0.0106383				1107
Feb	2015-03-02	15	2014	4	18	0	77	0				1108
Feb	2015-03-02	15	2014	4	20	2	31	0.0645161				1109
Feb	2015-03-02	24	2014	4	12	0	95	0				1110
Feb	2015-03-02	24	2014	4	14	0	105	0				1111
Feb	2015-03-02	24	2014	4	18	0	72	0				1112
Feb	2015-03-02	24	2014	4	20	0	38	0				1113
Feb	2015-03-02	32	2014	4	12	0	108	0				1114
Feb	2015-03-02	32	2014	4	14	0	107	0				1115
Feb	2015-03-02	32	2014	4	18	0	104	0				1116
Feb	2015-03-02	32	2014	4	20	0	27	0				1117
Feb	2015-03-02	10	2014	5	12	1	100	0.01				1118
Feb	2015-03-02	10	2014	5	14	2	103	0.0194175				1119
Feb	2015-03-02	10	2014	5	18	0	65	0				1120
Feb	2015-03-02	10	2014	5	20	2	59	0.0338983				1121
Feb	2015-03-02	15	2014	5	12	0	93	0				1122
Feb	2015-03-02	15	2014	5	14	3	100	0.03				1123
Feb	2015-03-02	15	2014	5	18	0	64	0				1124
Feb	2015-03-02	15	2014	5	20	1	31	0.0322581				1125
Feb	2015-03-02	24	2014	5	12	0	85	0				1126
Feb	2015-03-02	24	2014	5	14	0	97	0				1127
Feb	2015-03-02	24	2014	5	18	0	75	0				1128
Feb	2015-03-02	24	2014	5	20	0	42	0				1129
Feb	2015-03-02	32	2014	5	12	0	95	0				1130
Feb	2015-03-02	32	2014	5	14	0	110	0				1131
Feb	2015-03-02	32	2014	5	18	0	80	0				1132
Feb	2015-03-02	32	2014	5	20	0	22	0				1133
Feb												1134
Feb	2015-03-04	10	2014	1	12	1	70	0.0142857				1135
Feb	2015-03-04	10	2014	1	14	2	104	0.0192308				1136
Feb	2015-03-04	10	2014	1	18	0	63	0				1137
Feb	2015-03-04	10	2014	1	20	0	38	0				1138
Feb	2015-03-04	15	2014	1	12	0	96	0				1139
Feb	2015-03-04	15	2014	1	14	3	108	0.0277778				1140
Feb	2015-03-04	15	2014	1	18	0	75	0				1141
Feb	2015-03-04	15	2014	1	20	0	21	0				1142
Feb	2015-03-04	24	2014	1	12	0	89	0				1143
Feb	2015-03-04	24	2014	1	14	0	108	0				1144
Feb	2015-03-04	24	2014	1	18	0	84	0				1145
Feb	2015-03-04	24	2014	1	20	0	22	0				1146
Feb	2015-03-04	32	2014	1	12	0	102	0				1147
Feb	2015-03-04	32	2014	1	14	0	110	0				1148
Feb	2015-03-04	32	2014	1	18	0	76	0				1149
Feb	2015-03-04	32	2014	1	20	0	20	0				1150
Feb	2015-03-04	10	2014	2	12	0	72	0				1151
Feb	2015-03-04	10	2014	2	14	5	107	0.046729				1152
Feb	2015-03-04	10	2014	2	18	0	62	0				1153
Feb	2015-03-04	10	2014	2	20	0	32	0				1154
Feb	2015-03-04	15	2014	2	12	0	79	0				1155
Feb	2015-03-04	15	2014	2	14	1	116	0.00862069				1156
Feb	2015-03-04	15	2014	2	18	1	71	0.0140845				1157
Feb	2015-03-04	15	2014	2	20	0	26	0				1158
Feb	2015-03-04	24	2014	2	12	0	101	0				1159
Feb	2015-03-04	24	2014	2	14	0	106	0				1160
Feb	2015-03-04	24	2014	2	18	0	85	0				1161
Feb	2015-03-04	24	2014	2	20	0	41	0				1162
Feb	2015-03-04	32	2014	2	12	0	87	0				1163
Feb	2015-03-04	32	2014	2	14	0	107	0				1164
Feb	2015-03-04	32	2014	2	18	1	56	0.0178571				1165
Feb	2015-03-04	32	2014	2	20	0	20	0				1166
Feb	2015-03-04	10	2014	3	12	0	70	0				1167
Feb	2015-03-04	10	2014	3	14	0	110	0				1168
Feb	2015-03-04	10	2014	3	18	3	62	0.0483871				1169
Feb	2015-03-04	10	2014	3	20	3	41	0.0731707				1170
Feb	2015-03-04	15	2014	3	12	0	73	0				1171
Feb	2015-03-04	15	2014	3	14	0	95	0				1172
Feb	2015-03-04	15	2014	3	18	0	63	0				1173
Feb	2015-03-04	15	2014	3	20	0	23	0				1174
Feb	2015-03-04	24	2014	3	12	0	103	0				1175
Feb	2015-03-04	24	2014	3	14	0	84	0				1176
Feb	2015-03-04	24	2014	3	18	0	73	0				1177
Feb	2015-03-04	24	2014	3	20	0	37	0				1178
Feb	2015-03-04	32	2014	3	12	0	92	0				1179
Feb	2015-03-04	32	2014	3	14	0	96	0				1180
Feb	2015-03-04	32	2014	3	18	0	70	0				1181
Feb	2015-03-04	32	2014	3	20	0	25	0				1182
Feb	2015-03-04	10	2014	4	12	0	74	0				1183
Feb	2015-03-04	10	2014	4	14	4	108	0.037037				1184
Feb	2015-03-04	10	2014	4	18	0	66	0				1185
Feb	2015-03-04	10	2014	4	20	0	27	0				1186
Feb	2015-03-04	15	2014	4	12	0	85	0				1187
Feb	2015-03-04	15	2014	4	14	0	94	0				1188
Feb	2015-03-04	15	2014	4	18	2	77	0.025974				1189
Feb	2015-03-04	15	2014	4	20	1	31	0.0322581				1190
Feb	2015-03-04	24	2014	4	12	0	95	0				1191
Feb	2015-03-04	24	2014	4	14	0	105	0				1192
Feb	2015-03-04	24	2014	4	18	0	72	0				1193
Feb	2015-03-04	24	2014	4	20	0	38	0				1194
Feb	2015-03-04	32	2014	4	12	0	108	0				1195
Feb	2015-03-04	32	2014	4	14	0	107	0				1196
Feb	2015-03-04	32	2014	4	18	0	104	0				1197
Feb	2015-03-04	32	2014	4	20	0	27	0				1198
Feb	2015-03-04	10	2014	5	12	0	100	0				1199
Feb	2015-03-04	10	2014	5	14	5	103	0.0485437				1200
Feb	2015-03-04	10	2014	5	18	4	65	0.0615385				1201
Feb	2015-03-04	10	2014	5	20	0	59	0				1202
Feb	2015-03-04	15	2014	5	12	0	93	0				1203
Feb	2015-03-04	15	2014	5	14	2	100	0.02				1204
Feb	2015-03-04	15	2014	5	18	1	64	0.015625				1205
Feb	2015-03-04	15	2014	5	20	1	31	0.0322581				1206
Feb	2015-03-04	24	2014	5	12	0	85	0				1207
Feb	2015-03-04	24	2014	5	14	0	97	0				1208
Feb	2015-03-04	24	2014	5	18	0	75	0				1209
Feb	2015-03-04	24	2014	5	20	0	42	0				1210
Feb	2015-03-04	32	2014	5	12	0	95	0				1211
Feb	2015-03-04	32	2014	5	14	0	110	0				1212
Feb	2015-03-04	32	2014	5	18	0	80	0				1213
Feb	2015-03-04	32	2014	5	20	0	22	0				1214
												1215
April	2015-03-30	10	2014	1	12	0	83	0				1216
April	2015-03-30	10	2014	1	14	0	97	0				1217
April	2015-03-30	10	2014	1	18	0	68	0				1218
April	2015-03-30	10	2014	1	20	0	31	0				1219
April	2015-03-30	15	2014	1	12	1	50	0.02				1220
April	2015-03-30	15	2014	1	14	0	96	0				1221
April	2015-03-30	15	2014	1	18	0	68	0				1222
April	2015-03-30	15	2014	1	20	0	31	0				1223
April	2015-03-30	24	2014	1	12	6	52	0.115385				1224
April	2015-03-30	24	2014	1	14	3	102	0.0294118				1225
April	2015-03-30	24	2014	1	18	17	71	0.239437				1226
April	2015-03-30	24	2014	1	20	0	29	0				1227
April	2015-03-30	32	2014	1	12	15	70	0.214286				1228
April	2015-03-30	32	2014	1	14	0	90	0				1229
April	2015-03-30	32	2014	1	18	11	73	0.150685				1230
April	2015-03-30	32	2014	1	20	1	30	0.0333333				1231
April	2015-03-30	10	2014	2	12	0	92	0				1232
April	2015-03-30	10	2014	2	14	0	105	0				1233
April	2015-03-30	10	2014	2	18	0	68	0				1234
April	2015-03-30	10	2014	2	20	0	30	0				1235
April	2015-03-30	15	2014	2	12	3	75	0.04				1236
April	2015-03-30	15	2014	2	14	0	96	0				1237
April	2015-03-30	15	2014	2	18	0	71	0				1238
April	2015-03-30	15	2014	2	20	0	39	0				1239
April	2015-03-30	24	2014	2	12	15	80	0.1875				1240
April	2015-03-30	24	2014	2	14	0	103	0				1241
April	2015-03-30	24	2014	2	18	7	66	0.106061				1242
April	2015-03-30	24	2014	2	20	0	29	0				1243
April	2015-03-30	32	2014	2	12	14	64	0.21875				1244
April	2015-03-30	32	2014	2	14	0	90	0				1245
April	2015-03-30	32	2014	2	18	8	65	0.123077				1246
April	2015-03-30	32	2014	2	20	1	26	0.0384615				1247
April	2015-03-30	10	2014	3	12	0	75	0				1248
April	2015-03-30	10	2014	3	14	0	107	0				1249
April	2015-03-30	10	2014	3	18	0	72	0				1250
April	2015-03-30	10	2014	3	20	0	29	0				1251
April	2015-03-30	15	2014	3	12	3	84	0.0357143				1252
April	2015-03-30	15	2014	3	14	1	102	0.00980392				1253
April	2015-03-30	15	2014	3	18	0	62	0				1254
April	2015-03-30	15	2014	3	20	0	28	0				1255
April	2015-03-30	24	2014	3	12	10	80	0.125				1256
April	2015-03-30	24	2014	3	14	1	111	0.00900901				1257
April	2015-03-30	24	2014	3	18	15	60	0.25				1258
April	2015-03-30	24	2014	3	20	1	29	0.0344828				1259
April	2015-03-30	32	2014	3	12	12	50	0.24				1260
April	2015-03-30	32	2014	3	14	2	99	0.020202				1261
April	2015-03-30	32	2014	3	18	12	68	0.176471				1262
April	2015-03-30	32	2014	3	20	0	27	0				1263
April	2015-03-30	10	2014	4	12	1	81	0.0123457				1264
April	2015-03-30	10	2014	4	14	0	104	0				1265
April	2015-03-30	10	2014	4	18	2	62	0.0322581				1266
April	2015-03-30	10	2014	4	20	0	26	0				1267
April	2015-03-30	15	2014	4	12	1	76	0.0131579				1268
April	2015-03-30	15	2014	4	14	0	108	0				1269
April	2015-03-30	15	2014	4	18	0	66	0				1270
April	2015-03-30	15	2014	4	20	1	28	0.0357143				1271
April	2015-03-30	24	2014	4	12	9	62	0.145161				1272
April	2015-03-30	24	2014	4	14	1	106	0.00943396				1273
April	2015-03-30	24	2014	4	18	9	57	0.157895				1274
April	2015-03-30	24	2014	4	20	1	30	0.0333333				1275
April	2015-03-30	32	2014	4	12	14	57	0.245614				1276
April	2015-03-30	32	2014	4	14	0	98	0				1277
April	2015-03-30	32	2014	4	18	14	65	0.215385				1278
April	2015-03-30	32	2014	4	20	0	24	0				1279
April	2015-03-30	10	2014	5	12	0	76	0				1280
April	2015-03-30	10	2014	5	14	0	89	0				1281
April	2015-03-30	10	2014	5	18	0	69	0				1282
April	2015-03-30	10	2014	5	20	0	27	0				1283
April	2015-03-30	15	2014	5	12	2	77	0.025974				1284
April	2015-03-30	15	2014	5	14	0	99	0				1285
April	2015-03-30	15	2014	5	18	1	67	0.0149254				1286
April	2015-03-30	15	2014	5	20	0	24	0				1287
April	2015-03-30	24	2014	5	12	6	63	0.0952381				1288
April	2015-03-30	24	2014	5	14	1	101	0.00990099				1289
April	2015-03-30	24	2014	5	18	7	57	0.122807				1290
April	2015-03-30	24	2014	5	20	0	27	0				1291
April	2015-03-30	32	2014	5	12	13	76	0.171053				1292
April	2015-03-30	32	2014	5	14	0	91	0				1293
April	2015-03-30	32	2014	5	18	12	68	0.176471				1294
April	2015-03-30	32	2014	5	20	1	26	0.0384615				1295
April												1296
April	2015-04-01	10	2014	1	12	0	83	0				1297
April	2015-04-01	10	2014	1	14	0	97	0				1298
April	2015-04-01	10	2014	1	18	0	68	0				1299
April	2015-04-01	10	2014	1	20	0	31	0				1300
April	2015-04-01	15	2014	1	12	5	50	0.1				1301
April	2015-04-01	15	2014	1	14	1	96	0.0104167				1302
April	2015-04-01	15	2014	1	18	3	68	0.0441176				1303
April	2015-04-01	15	2014	1	20	0	31	0				1304
April	2015-04-01	24	2014	1	12	11	52	0.211538				1305
April	2015-04-01	24	2014	1	14	1	102	0.00980392				1306
April	2015-04-01	24	2014	1	18	9	71	0.126761				1307
April	2015-04-01	24	2014	1	20	0	29	0				1308
April	2015-04-01	32	2014	1	12	5	70	0.0714286				1309
April	2015-04-01	32	2014	1	14	1	90	0.0111111				1310
April	2015-04-01	32	2014	1	18	2	73	0.0273973				1311
April	2015-04-01	32	2014	1	20	0	30	0				1312
April	2015-04-01	10	2014	2	12	0	92	0				1313
April	2015-04-01	10	2014	2	14	0	105	0				1314
April	2015-04-01	10	2014	2	18	0	68	0				1315
April	2015-04-01	10	2014	2	20	0	30	0				1316
April	2015-04-01	15	2014	2	12	6	75	0.08				1317
April	2015-04-01	15	2014	2	14	0	96	0				1318
April	2015-04-01	15	2014	2	18	2	71	0.028169				1319
April	2015-04-01	15	2014	2	20	1	39	0.025641				1320
April	2015-04-01	24	2014	2	12	6	80	0.075				1321
April	2015-04-01	24	2014	2	14	0	103	0				1322
April	2015-04-01	24	2014	2	18	4	66	0.0606061				1323
April	2015-04-01	24	2014	2	20	0	29	0				1324
April	2015-04-01	32	2014	2	12	2	64	0.03125				1325
April	2015-04-01	32	2014	2	14	0	90	0				1326
April	2015-04-01	32	2014	2	18	5	65	0.0769231				1327
April	2015-04-01	32	2014	2	20	0	26	0				1328
April	2015-04-01	10	2014	3	12	0	75	0				1329
April	2015-04-01	10	2014	3	14	0	107	0				1330
April	2015-04-01	10	2014	3	18	0	72	0				1331
April	2015-04-01	10	2014	3	20	0	29	0				1332
April	2015-04-01	15	2014	3	12	11	84	0.130952				1333
April	2015-04-01	15	2014	3	14	0	102	0				1334
April	2015-04-01	15	2014	3	18	0	62	0				1335
April	2015-04-01	15	2014	3	20	0	28	0				1336
April	2015-04-01	24	2014	3	12	11	80	0.1375				1337
April	2015-04-01	24	2014	3	14	0	111	0				1338
April	2015-04-01	24	2014	3	18	2	60	0.0333333				1339
April	2015-04-01	24	2014	3	20	0	29	0				1340
April	2015-04-01	32	2014	3	12	3	50	0.06				1341
April	2015-04-01	32	2014	3	14	1	99	0.010101				1342
April	2015-04-01	32	2014	3	18	2	68	0.0294118				1343
April	2015-04-01	32	2014	3	20	0	27	0				1344
April	2015-04-01	10	2014	4	12	0	81	0				1345
April	2015-04-01	10	2014	4	14	0	104	0				1346
April	2015-04-01	10	2014	4	18	0	62	0				1347
April	2015-04-01	10	2014	4	20	0	26	0				1348
April	2015-04-01	15	2014	4	12	6	76	0.0789474				1349
April	2015-04-01	15	2014	4	14	1	108	0.00925926				1350
April	2015-04-01	15	2014	4	18	1	66	0.0151515				1351
April	2015-04-01	15	2014	4	20	0	28	0				1352
April	2015-04-01	24	2014	4	12	2	62	0.0322581				1353
April	2015-04-01	24	2014	4	14	1	106	0.00943396				1354
April	2015-04-01	24	2014	4	18	5	57	0.0877193				1355
April	2015-04-01	24	2014	4	20	1	30	0.0333333				1356
April	2015-04-01	32	2014	4	12	3	57	0.0526316				1357
April	2015-04-01	32	2014	4	14	0	98	0				1358
April	2015-04-01	32	2014	4	18	0	65	0				1359
April	2015-04-01	32	2014	4	20	0	24	0				1360
April	2015-04-01	10	2014	5	12	0	76	0				1361
April	2015-04-01	10	2014	5	14	0	89	0				1362
April	2015-04-01	10	2014	5	18	0	69	0				1363
April	2015-04-01	10	2014	5	20	0	27	0				1364
April	2015-04-01	15	2014	5	12	3	77	0.038961				1365
April	2015-04-01	15	2014	5	14	0	99	0				1366
April	2015-04-01	15	2014	5	18	3	67	0.0447761				1367
April	2015-04-01	15	2014	5	20	0	24	0				1368
April	2015-04-01	24	2014	5	12	5	63	0.0793651				1369
April	2015-04-01	24	2014	5	14	2	101	0.019802				1370
April	2015-04-01	24	2014	5	18	5	57	0.0877193				1371
April	2015-04-01	24	2014	5	20	0	27	0				1372
April	2015-04-01	32	2014	5	12	3	76	0.0394737				1373
April	2015-04-01	32	2014	5	14	0	91	0				1374
April	2015-04-01	32	2014	5	18	4	68	0.0588235				1375
April	2015-04-01	32	2014	5	20	0	26	0				1376
April												1377
April	2015-04-03	10	2014	1	12	0	83	0				1378
April	2015-04-03	10	2014	1	14	0	97	0				1379
April	2015-04-03	10	2014	1	18	0	68	0				1380
April	2015-04-03	10	2014	1	20	0	31	0				1381
April	2015-04-03	15	2014	1	12	2	50	0.04				1382
April	2015-04-03	15	2014	1	14	0	96	0				1383
April	2015-04-03	15	2014	1	18	2	68	0.0294118				1384
April	2015-04-03	15	2014	1	20	0	31	0				1385
April	2015-04-03	24	2014	1	12	1	52	0.0192308				1386
April	2015-04-03	24	2014	1	14	2	102	0.0196078				1387
April	2015-04-03	24	2014	1	18	1	71	0.0140845				1388
April	2015-04-03	24	2014	1	20	1	29	0.0344828				1389
April	2015-04-03	32	2014	1	12	1	70	0.0142857				1390
April	2015-04-03	32	2014	1	14	0	90	0				1391
April	2015-04-03	32	2014	1	18	1	73	0.0136986				1392
April	2015-04-03	32	2014	1	20	0	30	0				1393
April	2015-04-03	10	2014	2	12	0	92	0				1394
April	2015-04-03	10	2014	2	14	0	105	0				1395
April	2015-04-03	10	2014	2	18	2	68	0.0294118				1396
April	2015-04-03	10	2014	2	20	0	30	0				1397
April	2015-04-03	15	2014	2	12	1	75	0.0133333				1398
April	2015-04-03	15	2014	2	14	0	96	0				1399
April	2015-04-03	15	2014	2	18	1	71	0.0140845				1400
April	2015-04-03	15	2014	2	20	2	39	0.0512821				1401
April	2015-04-03	24	2014	2	12	4	80	0.05				1402
April	2015-04-03	24	2014	2	14	2	103	0.0194175				1403
April	2015-04-03	24	2014	2	18	2	66	0.030303				1404
April	2015-04-03	24	2014	2	20	0	29	0				1405
April	2015-04-03	32	2014	2	12	2	64	0.03125				1406
April	2015-04-03	32	2014	2	14	0	90	0				1407
April	2015-04-03	32	2014	2	18	0	65	0				1408
April	2015-04-03	32	2014	2	20	0	26	0				1409
April	2015-04-03	10	2014	3	12	0	75	0				1410
April	2015-04-03	10	2014	3	14	0	107	0				1411
April	2015-04-03	10	2014	3	18	2	72	0.0277778				1412
April	2015-04-03	10	2014	3	20	1	29	0.0344828				1413
April	2015-04-03	15	2014	3	12	6	84	0.0714286				1414
April	2015-04-03	15	2014	3	14	0	102	0				1415
April	2015-04-03	15	2014	3	18	2	62	0.0322581				1416
April	2015-04-03	15	2014	3	20	1	28	0.0357143				1417
April	2015-04-03	24	2014	3	12	2	80	0.025				1418
April	2015-04-03	24	2014	3	14	1	111	0.00900901				1419
April	2015-04-03	24	2014	3	18	0	60	0				1420
April	2015-04-03	24	2014	3	20	0	29	0				1421
April	2015-04-03	32	2014	3	12	1	50	0.02				1422
April	2015-04-03	32	2014	3	14	0	99	0				1423
April	2015-04-03	32	2014	3	18	0	68	0				1424
April	2015-04-03	32	2014	3	20	0	27	0				1425
April	2015-04-03	10	2014	4	12	0	81	0				1426
April	2015-04-03	10	2014	4	14	0	104	0				1427
April	2015-04-03	10	2014	4	18	1	62	0.016129				1428
April	2015-04-03	10	2014	4	20	0	26	0				1429
April	2015-04-03	15	2014	4	12	7	76	0.0921053				1430
April	2015-04-03	15	2014	4	14	0	108	0				1431
April	2015-04-03	15	2014	4	18	2	66	0.030303				1432
April	2015-04-03	15	2014	4	20	2	28	0.0714286				1433
April	2015-04-03	24	2014	4	12	0	62	0				1434
April	2015-04-03	24	2014	4	14	0	106	0				1435
April	2015-04-03	24	2014	4	18	0	57	0				1436
April	2015-04-03	24	2014	4	20	0	30	0				1437
April	2015-04-03	32	2014	4	12	0	57	0				1438
April	2015-04-03	32	2014	4	14	0	98	0				1439
April	2015-04-03	32	2014	4	18	1	65	0.0153846				1440
April	2015-04-03	32	2014	4	20	0	24	0				1441
April	2015-04-03	10	2014	5	12	0	76	0				1442
April	2015-04-03	10	2014	5	14	0	89	0				1443
April	2015-04-03	10	2014	5	18	0	69	0				1444
April	2015-04-03	10	2014	5	20	0	27	0				1445
April	2015-04-03	15	2014	5	12	2	77	0.025974				1446
April	2015-04-03	15	2014	5	14	1	99	0.010101				1447
April	2015-04-03	15	2014	5	18	0	67	0				1448
April	2015-04-03	15	2014	5	20	2	24	0.0833333				1449
April	2015-04-03	24	2014	5	12	1	63	0.015873				1450
April	2015-04-03	24	2014	5	14	0	101	0				1451
April	2015-04-03	24	2014	5	18	0	57	0				1452
April	2015-04-03	24	2014	5	20	0	27	0				1453
April	2015-04-03	32	2014	5	12	1	76	0.0131579				1454
April	2015-04-03	32	2014	5	14	0	91	0				1455
April	2015-04-03	32	2014	5	18	1	68	0.0147059				1456
April	2015-04-03	32	2014	5	20	0	26	0				1457
April												1458
April	2015-04-06	10	2014	1	12	0	83	0				1459
April	2015-04-06	10	2014	1	14	0	97	0				1460
April	2015-04-06	10	2014	1	18	1	68	0.0147059				1461
April	2015-04-06	10	2014	1	20	0	31	0				1462
April	2015-04-06	15	2014	1	12	0	50	0				1463
April	2015-04-06	15	2014	1	14	1	96	0.0104167				1464
April	2015-04-06	15	2014	1	18	0	68	0				1465
April	2015-04-06	15	2014	1	20	4	31	0.129032				1466
April	2015-04-06	24	2014	1	12	2	52	0.0384615				1467
April	2015-04-06	24	2014	1	14	2	102	0.0196078				1468
April	2015-04-06	24	2014	1	18	0	71	0				1469
April	2015-04-06	24	2014	1	20	0	29	0				1470
April	2015-04-06	32	2014	1	12	1	70	0.0142857				1471
April	2015-04-06	32	2014	1	14	0	90	0				1472
April	2015-04-06	32	2014	1	18	0	73	0				1473
April	2015-04-06	32	2014	1	20	0	30	0				1474
April	2015-04-06	10	2014	2	12	0	92	0				1475
April	2015-04-06	10	2014	2	14	0	105	0				1476
April	2015-04-06	10	2014	2	18	3	68	0.0441176				1477
April	2015-04-06	10	2014	2	20	2	30	0.0666667				1478
April	2015-04-06	15	2014	2	12	2	75	0.0266667				1479
April	2015-04-06	15	2014	2	14	1	96	0.0104167				1480
April	2015-04-06	15	2014	2	18	2	71	0.028169				1481
April	2015-04-06	15	2014	2	20	2	39	0.0512821				1482
April	2015-04-06	24	2014	2	12	1	80	0.0125				1483
April	2015-04-06	24	2014	2	14	4	103	0.038835				1484
April	2015-04-06	24	2014	2	18	3	66	0.0454545				1485
April	2015-04-06	24	2014	2	20	1	29	0.0344828				1486
April	2015-04-06	32	2014	2	12	1	64	0.015625				1487
April	2015-04-06	32	2014	2	14	0	90	0				1488
April	2015-04-06	32	2014	2	18	0	65	0				1489
April	2015-04-06	32	2014	2	20	0	26	0				1490
April	2015-04-06	10	2014	3	12	0	75	0				1491
April	2015-04-06	10	2014	3	14	0	107	0				1492
April	2015-04-06	10	2014	3	18	2	72	0.0277778				1493
April	2015-04-06	10	2014	3	20	2	29	0.0689655				1494
April	2015-04-06	15	2014	3	12	1	84	0.0119048				1495
April	2015-04-06	15	2014	3	14	1	102	0.00980392				1496
April	2015-04-06	15	2014	3	18	2	62	0.0322581				1497
April	2015-04-06	15	2014	3	20	1	28	0.0357143				1498
April	2015-04-06	24	2014	3	12	0	80	0				1499
April	2015-04-06	24	2014	3	14	2	111	0.018018				1500
April	2015-04-06	24	2014	3	18	1	60	0.0166667				1501
April	2015-04-06	24	2014	3	20	0	29	0				1502
April	2015-04-06	32	2014	3	12	1	50	0.02				1503
April	2015-04-06	32	2014	3	14	0	99	0				1504
April	2015-04-06	32	2014	3	18	0	68	0				1505
April	2015-04-06	32	2014	3	20	0	27	0				1506
April	2015-04-06	10	2014	4	12	1	81	0.0123457				1507
April	2015-04-06	10	2014	4	14	0	104	0				1508
April	2015-04-06	10	2014	4	18	1	62	0.016129				1509
April	2015-04-06	10	2014	4	20	0	26	0				1510
April	2015-04-06	15	2014	4	12	5	76	0.0657895				1511
April	2015-04-06	15	2014	4	14	1	108	0.00925926				1512
April	2015-04-06	15	2014	4	18	4	66	0.0606061				1513
April	2015-04-06	15	2014	4	20	0	28	0				1514
April	2015-04-06	24	2014	4	12	1	62	0.016129				1515
April	2015-04-06	24	2014	4	14	2	106	0.0188679				1516
April	2015-04-06	24	2014	4	18	1	57	0.0175439				1517
April	2015-04-06	24	2014	4	20	0	30	0				1518
April	2015-04-06	32	2014	4	12	0	57	0				1519
April	2015-04-06	32	2014	4	14	0	98	0				1520
April	2015-04-06	32	2014	4	18	0	65	0				1521
April	2015-04-06	32	2014	4	20	0	24	0				1522
April	2015-04-06	10	2014	5	12	1	76	0.0131579				1523
April	2015-04-06	10	2014	5	14	0	89	0				1524
April	2015-04-06	10	2014	5	18	0	69	0				1525
April	2015-04-06	10	2014	5	20	3	27	0.111111				1526
April	2015-04-06	15	2014	5	12	3	77	0.038961				1527
April	2015-04-06	15	2014	5	14	1	99	0.010101				1528
April	2015-04-06	15	2014	5	18	2	67	0.0298507				1529
April	2015-04-06	15	2014	5	20	1	24	0.0416667				1530
April	2015-04-06	24	2014	5	12	1	63	0.015873				1531
April	2015-04-06	24	2014	5	14	2	101	0.019802				1532
April	2015-04-06	24	2014	5	18	2	57	0.0350877				1533
April	2015-04-06	24	2014	5	20	0	27	0				1534
April	2015-04-06	32	2014	5	12	1	76	0.0131579				1535
April	2015-04-06	32	2014	5	14	0	91	0				1536
April	2015-04-06	32	2014	5	18	0	68	0				1537
April	2015-04-06	32	2014	5	20	0	26	0				1538
April												1539
April	2015-04-08	10	2014	1	12	0	83	0				1540
April	2015-04-08	10	2014	1	14	0	97	0				1541
April	2015-04-08	10	2014	1	18	1	68	0.0147059				1542
April	2015-04-08	10	2014	1	20	1	31	0.0322581				1543
April	2015-04-08	15	2014	1	12	0	50	0				1544
April	2015-04-08	15	2014	1	14	6	96	0.0625				1545
April	2015-04-08	15	2014	1	18	3	68	0.0441176				1546
April	2015-04-08	15	2014	1	20	1	31	0.0322581				1547
April	2015-04-08	24	2014	1	12	2	52	0.0384615				1548
April	2015-04-08	24	2014	1	14	2	102	0.0196078				1549
April	2015-04-08	24	2014	1	18	0	71	0				1550
April	2015-04-08	24	2014	1	20	0	29	0				1551
April	2015-04-08	32	2014	1	12	0	70	0				1552
April	2015-04-08	32	2014	1	14	0	90	0				1553
April	2015-04-08	32	2014	1	18	0	73	0				1554
April	2015-04-08	32	2014	1	20	0	30	0				1555
April	2015-04-08	10	2014	2	12	0	92	0				1556
April	2015-04-08	10	2014	2	14	0	105	0				1557
April	2015-04-08	10	2014	2	18	2	68	0.0294118				1558
April	2015-04-08	10	2014	2	20	2	30	0.0666667				1559
April	2015-04-08	15	2014	2	12	0	75	0				1560
April	2015-04-08	15	2014	2	14	2	96	0.0208333				1561
April	2015-04-08	15	2014	2	18	2	71	0.028169				1562
April	2015-04-08	15	2014	2	20	1	39	0.025641				1563
April	2015-04-08	24	2014	2	12	0	80	0				1564
April	2015-04-08	24	2014	2	14	0	103	0				1565
April	2015-04-08	24	2014	2	18	0	66	0				1566
April	2015-04-08	24	2014	2	20	0	29	0				1567
April	2015-04-08	32	2014	2	12	1	64	0.015625				1568
April	2015-04-08	32	2014	2	14	0	90	0				1569
April	2015-04-08	32	2014	2	18	0	65	0				1570
April	2015-04-08	32	2014	2	20	0	26	0				1571
April	2015-04-08	10	2014	3	12	0	75	0				1572
April	2015-04-08	10	2014	3	14	0	107	0				1573
April	2015-04-08	10	2014	3	18	1	72	0.0138889				1574
April	2015-04-08	10	2014	3	20	1	29	0.0344828				1575
April	2015-04-08	15	2014	3	12	1	84	0.0119048				1576
April	2015-04-08	15	2014	3	14	8	102	0.0784314				1577
April	2015-04-08	15	2014	3	18	8	62	0.129032				1578
April	2015-04-08	15	2014	3	20	0	28	0				1579
April	2015-04-08	24	2014	3	12	2	80	0.025				1580
April	2015-04-08	24	2014	3	14	1	111	0.00900901				1581
April	2015-04-08	24	2014	3	18	0	60	0				1582
April	2015-04-08	24	2014	3	20	0	29	0				1583
April	2015-04-08	32	2014	3	12	0	50	0				1584
April	2015-04-08	32	2014	3	14	0	99	0				1585
April	2015-04-08	32	2014	3	18	0	68	0				1586
April	2015-04-08	32	2014	3	20	0	27	0				1587
April	2015-04-08	10	2014	4	12	2	81	0.0246914				1588
April	2015-04-08	10	2014	4	14	1	104	0.00961538				1589
April	2015-04-08	10	2014	4	18	0	62	0				1590
April	2015-04-08	10	2014	4	20	2	26	0.0769231				1591
April	2015-04-08	15	2014	4	12	0	76	0				1592
April	2015-04-08	15	2014	4	14	7	108	0.0648148				1593
April	2015-04-08	15	2014	4	18	1	66	0.0151515				1594
April	2015-04-08	15	2014	4	20	1	28	0.0357143				1595
April	2015-04-08	24	2014	4	12	0	62	0				1596
April	2015-04-08	24	2014	4	14	1	106	0.00943396				1597
April	2015-04-08	24	2014	4	18	0	57	0				1598
April	2015-04-08	24	2014	4	20	0	30	0				1599
April	2015-04-08	32	2014	4	12	1	57	0.0175439				1600
April	2015-04-08	32	2014	4	14	0	98	0				1601
April	2015-04-08	32	2014	4	18	0	65	0				1602
April	2015-04-08	32	2014	4	20	0	24	0				1603
April	2015-04-08	10	2014	5	12	0	76	0				1604
April	2015-04-08	10	2014	5	14	0	89	0				1605
April	2015-04-08	10	2014	5	18	0	69	0				1606
April	2015-04-08	10	2014	5	20	1	27	0.037037				1607
April	2015-04-08	15	2014	5	12	0	77	0				1608
April	2015-04-08	15	2014	5	14	6	99	0.0606061				1609
April	2015-04-08	15	2014	5	18	6	67	0.0895522				1610
April	2015-04-08	15	2014	5	20	0	24	0				1611
April	2015-04-08	24	2014	5	12	0	63	0				1612
April	2015-04-08	24	2014	5	14	0	101	0				1613
April	2015-04-08	24	2014	5	18	0	57	0				1614
April	2015-04-08	24	2014	5	20	0	27	0				1615
April	2015-04-08	32	2014	5	12	0	76	0				1616
April	2015-04-08	32	2014	5	14	0	91	0				1617
April	2015-04-08	32	2014	5	18	0	68	0				1618
April	2015-04-08	32	2014	5	20	0	26	0				1619
April												1620
April	2015-04-10	10	2014	1	12	0	83	0				1621
April	2015-04-10	10	2014	1	14	2	97	0.0206186				1622
April	2015-04-10	10	2014	1	18	1	68	0.0147059				1623
April	2015-04-10	10	2014	1	20	3	31	0.0967742				1624
April	2015-04-10	15	2014	1	12	0	50	0				1625
April	2015-04-10	15	2014	1	14	17	96	0.177083				1626
April	2015-04-10	15	2014	1	18	2	68	0.0294118				1627
April	2015-04-10	15	2014	1	20	2	31	0.0645161				1628
April	2015-04-10	24	2014	1	12	0	52	0				1629
April	2015-04-10	24	2014	1	14	1	102	0.00980392				1630
April	2015-04-10	24	2014	1	18	0	71	0				1631
April	2015-04-10	24	2014	1	20	0	29	0				1632
April	2015-04-10	32	2014	1	12	0	70	0				1633
April	2015-04-10	32	2014	1	14	0	90	0				1634
April	2015-04-10	32	2014	1	18	0	73	0				1635
April	2015-04-10	32	2014	1	20	0	30	0				1636
April	2015-04-10	10	2014	2	12	0	92	0				1637
April	2015-04-10	10	2014	2	14	1	105	0.00952381				1638
April	2015-04-10	10	2014	2	18	0	68	0				1639
April	2015-04-10	10	2014	2	20	0	30	0				1640
April	2015-04-10	15	2014	2	12	1	75	0.0133333				1641
April	2015-04-10	15	2014	2	14	13	96	0.135417				1642
April	2015-04-10	15	2014	2	18	6	71	0.084507				1643
April	2015-04-10	15	2014	2	20	0	39	0				1644
April	2015-04-10	24	2014	2	12	0	80	0				1645
April	2015-04-10	24	2014	2	14	0	103	0				1646
April	2015-04-10	24	2014	2	18	0	66	0				1647
April	2015-04-10	24	2014	2	20	0	29	0				1648
April	2015-04-10	32	2014	2	12	0	64	0				1649
April	2015-04-10	32	2014	2	14	0	90	0				1650
April	2015-04-10	32	2014	2	18	0	65	0				1651
April	2015-04-10	32	2014	2	20	3	26	0.115385				1652
April	2015-04-10	10	2014	3	12	0	75	0				1653
April	2015-04-10	10	2014	3	14	0	107	0				1654
April	2015-04-10	10	2014	3	18	2	72	0.0277778				1655
April	2015-04-10	10	2014	3	20	0	29	0				1656
April	2015-04-10	15	2014	3	12	0	84	0				1657
April	2015-04-10	15	2014	3	14	14	102	0.137255				1658
April	2015-04-10	15	2014	3	18	10	62	0.16129				1659
April	2015-04-10	15	2014	3	20	1	28	0.0357143				1660
April	2015-04-10	24	2014	3	12	0	80	0				1661
April	2015-04-10	24	2014	3	14	0	111	0				1662
April	2015-04-10	24	2014	3	18	0	60	0				1663
April	2015-04-10	24	2014	3	20	0	29	0				1664
April	2015-04-10	32	2014	3	12	0	50	0				1665
April	2015-04-10	32	2014	3	14	0	99	0				1666
April	2015-04-10	32	2014	3	18	0	68	0				1667
April	2015-04-10	32	2014	3	20	0	27	0				1668
April	2015-04-10	10	2014	4	12	0	81	0				1669
April	2015-04-10	10	2014	4	14	0	104	0				1670
April	2015-04-10	10	2014	4	18	2	62	0.0322581				1671
April	2015-04-10	10	2014	4	20	0	26	0				1672
April	2015-04-10	15	2014	4	12	0	76	0				1673
April	2015-04-10	15	2014	4	14	16	108	0.148148				1674
April	2015-04-10	15	2014	4	18	9	66	0.136364				1675
April	2015-04-10	15	2014	4	20	0	28	0				1676
April	2015-04-10	24	2014	4	12	1	62	0.016129				1677
April	2015-04-10	24	2014	4	14	1	106	0.00943396				1678
April	2015-04-10	24	2014	4	18	0	57	0				1679
April	2015-04-10	24	2014	4	20	0	30	0				1680
April	2015-04-10	32	2014	4	12	0	57	0				1681
April	2015-04-10	32	2014	4	14	0	98	0				1682
April	2015-04-10	32	2014	4	18	0	65	0				1683
April	2015-04-10	32	2014	4	20	0	24	0				1684
April	2015-04-10	10	2014	5	12	0	76	0				1685
April	2015-04-10	10	2014	5	14	1	89	0.011236				1686
April	2015-04-10	10	2014	5	18	1	69	0.0144928				1687
April	2015-04-10	10	2014	5	20	3	27	0.111111				1688
April	2015-04-10	15	2014	5	12	0	77	0				1689
April	2015-04-10	15	2014	5	14	9	99	0.0909091				1690
April	2015-04-10	15	2014	5	18	5	67	0.0746269				1691
April	2015-04-10	15	2014	5	20	0	24	0				1692
April	2015-04-10	24	2014	5	12	0	63	0				1693
April	2015-04-10	24	2014	5	14	0	101	0				1694
April	2015-04-10	24	2014	5	18	0	57	0				1695
April	2015-04-10	24	2014	5	20	0	27	0				1696
April	2015-04-10	32	2014	5	12	0	76	0				1697
April	2015-04-10	32	2014	5	14	0	91	0				1698
April	2015-04-10	32	2014	5	18	0	68	0				1699
April	2015-04-10	32	2014	5	20	0	26	0				1700
April												1701
April	2015-04-13	10	2014	1	12	0	83	0				1702
April	2015-04-13	10	2014	1	14	0	97	0				1703
April	2015-04-13	10	2014	1	18	0	68	0				1704
April	2015-04-13	10	2014	1	20	1	31	0.0322581				1705
April	2015-04-13	15	2014	1	12	0	50	0				1706
April	2015-04-13	15	2014	1	14	16	96	0.166667				1707
April	2015-04-13	15	2014	1	18	6	68	0.0882353				1708
April	2015-04-13	15	2014	1	20	0	31	0				1709
April	2015-04-13	24	2014	1	12	0	52	0				1710
April	2015-04-13	24	2014	1	14	0	102	0				1711
April	2015-04-13	24	2014	1	18	0	71	0				1712
April	2015-04-13	24	2014	1	20	0	29	0				1713
April	2015-04-13	32	2014	1	12	0	70	0				1714
April	2015-04-13	32	2014	1	14	0	90	0				1715
April	2015-04-13	32	2014	1	18	0	73	0				1716
April	2015-04-13	32	2014	1	20	0	30	0				1717
April	2015-04-13	10	2014	2	12	1	92	0.0108696				1718
April	2015-04-13	10	2014	2	14	0	105	0				1719
April	2015-04-13	10	2014	2	18	2	68	0.0294118				1720
April	2015-04-13	10	2014	2	20	1	30	0.0333333				1721
April	2015-04-13	15	2014	2	12	1	75	0.0133333				1722
April	2015-04-13	15	2014	2	14	26	96	0.270833				1723
April	2015-04-13	15	2014	2	18	9	71	0.126761				1724
April	2015-04-13	15	2014	2	20	1	39	0.025641				1725
April	2015-04-13	24	2014	2	12	0	80	0				1726
April	2015-04-13	24	2014	2	14	0	103	0				1727
April	2015-04-13	24	2014	2	18	0	66	0				1728
April	2015-04-13	24	2014	2	20	0	29	0				1729
April	2015-04-13	32	2014	2	12	0	64	0				1730
April	2015-04-13	32	2014	2	14	0	90	0				1731
April	2015-04-13	32	2014	2	18	0	65	0				1732
April	2015-04-13	32	2014	2	20	0	26	0				1733
April	2015-04-13	10	2014	3	12	0	75	0				1734
April	2015-04-13	10	2014	3	14	1	107	0.00934579				1735
April	2015-04-13	10	2014	3	18	2	72	0.0277778				1736
April	2015-04-13	10	2014	3	20	1	29	0.0344828				1737
April	2015-04-13	15	2014	3	12	0	84	0				1738
April	2015-04-13	15	2014	3	14	22	102	0.215686				1739
April	2015-04-13	15	2014	3	18	2	62	0.0322581				1740
April	2015-04-13	15	2014	3	20	0	28	0				1741
April	2015-04-13	24	2014	3	12	1	80	0.0125				1742
April	2015-04-13	24	2014	3	14	0	111	0				1743
April	2015-04-13	24	2014	3	18	0	60	0				1744
April	2015-04-13	24	2014	3	20	0	29	0				1745
April	2015-04-13	32	2014	3	12	0	50	0				1746
April	2015-04-13	32	2014	3	14	0	99	0				1747
April	2015-04-13	32	2014	3	18	0	68	0				1748
April	2015-04-13	32	2014	3	20	0	27	0				1749
April	2015-04-13	10	2014	4	12	0	81	0				1750
April	2015-04-13	10	2014	4	14	1	104	0.00961538				1751
April	2015-04-13	10	2014	4	18	0	62	0				1752
April	2015-04-13	10	2014	4	20	1	26	0.0384615				1753
April	2015-04-13	15	2014	4	12	0	76	0				1754
April	2015-04-13	15	2014	4	14	18	108	0.166667				1755
April	2015-04-13	15	2014	4	18	3	66	0.0454545				1756
April	2015-04-13	15	2014	4	20	2	28	0.0714286				1757
April	2015-04-13	24	2014	4	12	0	62	0				1758
April	2015-04-13	24	2014	4	14	1	106	0.00943396				1759
April	2015-04-13	24	2014	4	18	0	57	0				1760
April	2015-04-13	24	2014	4	20	0	30	0				1761
April	2015-04-13	32	2014	4	12	0	57	0				1762
April	2015-04-13	32	2014	4	14	0	98	0				1763
April	2015-04-13	32	2014	4	18	0	65	0				1764
April	2015-04-13	32	2014	4	20	0	24	0				1765
April	2015-04-13	10	2014	5	12	0	76	0				1766
April	2015-04-13	10	2014	5	14	0	89	0				1767
April	2015-04-13	10	2014	5	18	1	69	0.0144928				1768
April	2015-04-13	10	2014	5	20	1	27	0.037037				1769
April	2015-04-13	15	2014	5	12	0	77	0				1770
April	2015-04-13	15	2014	5	14	20	99	0.20202				1771
April	2015-04-13	15	2014	5	18	5	67	0.0746269				1772
April	2015-04-13	15	2014	5	20	0	24	0				1773
April	2015-04-13	24	2014	5	12	0	63	0				1774
April	2015-04-13	24	2014	5	14	0	101	0				1775
April	2015-04-13	24	2014	5	18	0	57	0				1776
April	2015-04-13	24	2014	5	20	0	27	0				1777
April	2015-04-13	32	2014	5	12	0	76	0				1778
April	2015-04-13	32	2014	5	14	0	91	0				1779
April	2015-04-13	32	2014	5	18	0	68	0				1780
April	2015-04-13	32	2014	5	20	0	26	0				1781
April												1782
April	2015-04-15	10	2014	1	12	0	83	0				1783
April	2015-04-15	10	2014	1	14	5	97	0.0515464				1784
April	2015-04-15	10	2014	1	18	1	68	0.0147059				1785
April	2015-04-15	10	2014	1	20	0	31	0				1786
April	2015-04-15	15	2014	1	12	0	50	0				1787
April	2015-04-15	15	2014	1	14	9	96	0.09375				1788
April	2015-04-15	15	2014	1	18	3	68	0.0441176				1789
April	2015-04-15	15	2014	1	20	2	31	0.0645161				1790
April	2015-04-15	24	2014	1	12	0	52	0				1791
April	2015-04-15	24	2014	1	14	0	102	0				1792
April	2015-04-15	24	2014	1	18	0	71	0				1793
April	2015-04-15	24	2014	1	20	0	29	0				1794
April	2015-04-15	32	2014	1	12	1	70	0.0142857				1795
April	2015-04-15	32	2014	1	14	0	90	0				1796
April	2015-04-15	32	2014	1	18	0	73	0				1797
April	2015-04-15	32	2014	1	20	0	30	0				1798
April	2015-04-15	10	2014	2	12	0	92	0				1799
April	2015-04-15	10	2014	2	14	0	105	0				1800
April	2015-04-15	10	2014	2	18	0	68	0				1801
April	2015-04-15	10	2014	2	20	0	30	0				1802
April	2015-04-15	15	2014	2	12	1	75	0.0133333				1803
April	2015-04-15	15	2014	2	14	10	96	0.104167				1804
April	2015-04-15	15	2014	2	18	2	71	0.028169				1805
April	2015-04-15	15	2014	2	20	0	39	0				1806
April	2015-04-15	24	2014	2	12	0	80	0				1807
April	2015-04-15	24	2014	2	14	0	103	0				1808
April	2015-04-15	24	2014	2	18	0	66	0				1809
April	2015-04-15	24	2014	2	20	0	29	0				1810
April	2015-04-15	32	2014	2	12	0	64	0				1811
April	2015-04-15	32	2014	2	14	0	90	0				1812
April	2015-04-15	32	2014	2	18	0	65	0				1813
April	2015-04-15	32	2014	2	20	0	26	0				1814
April	2015-04-15	10	2014	3	12	0	75	0				1815
April	2015-04-15	10	2014	3	14	4	107	0.0373832				1816
April	2015-04-15	10	2014	3	18	2	72	0.0277778				1817
April	2015-04-15	10	2014	3	20	0	29	0				1818
April	2015-04-15	15	2014	3	12	0	84	0				1819
April	2015-04-15	15	2014	3	14	7	102	0.0686275				1820
April	2015-04-15	15	2014	3	18	2	62	0.0322581				1821
April	2015-04-15	15	2014	3	20	0	28	0				1822
April	2015-04-15	24	2014	3	12	0	80	0				1823
April	2015-04-15	24	2014	3	14	0	111	0				1824
April	2015-04-15	24	2014	3	18	0	60	0				1825
April	2015-04-15	24	2014	3	20	0	29	0				1826
April	2015-04-15	32	2014	3	12	0	50	0				1827
April	2015-04-15	32	2014	3	14	0	99	0				1828
April	2015-04-15	32	2014	3	18	0	68	0				1829
April	2015-04-15	32	2014	3	20	0	27	0				1830
April	2015-04-15	10	2014	4	12	0	81	0				1831
April	2015-04-15	10	2014	4	14	2	104	0.0192308				1832
April	2015-04-15	10	2014	4	18	1	62	0.016129				1833
April	2015-04-15	10	2014	4	20	1	26	0.0384615				1834
April	2015-04-15	15	2014	4	12	1	76	0.0131579				1835
April	2015-04-15	15	2014	4	14	8	108	0.0740741				1836
April	2015-04-15	15	2014	4	18	3	66	0.0454545				1837
April	2015-04-15	15	2014	4	20	0	28	0				1838
April	2015-04-15	24	2014	4	12	1	62	0.016129				1839
April	2015-04-15	24	2014	4	14	0	106	0				1840
April	2015-04-15	24	2014	4	18	0	57	0				1841
April	2015-04-15	24	2014	4	20	0	30	0				1842
April	2015-04-15	32	2014	4	12	0	57	0				1843
April	2015-04-15	32	2014	4	14	0	98	0				1844
April	2015-04-15	32	2014	4	18	0	65	0				1845
April	2015-04-15	32	2014	4	20	0	24	0				1846
April	2015-04-15	10	2014	5	12	0	76	0				1847
April	2015-04-15	10	2014	5	14	2	89	0.0224719				1848
April	2015-04-15	10	2014	5	18	2	69	0.0289855				1849
April	2015-04-15	10	2014	5	20	1	27	0.037037				1850
April	2015-04-15	15	2014	5	12	0	77	0				1851
April	2015-04-15	15	2014	5	14	7	99	0.0707071				1852
April	2015-04-15	15	2014	5	18	3	67	0.0447761				1853
April	2015-04-15	15	2014	5	20	0	24	0				1854
April	2015-04-15	24	2014	5	12	0	63	0				1855
April	2015-04-15	24	2014	5	14	0	101	0				1856
April	2015-04-15	24	2014	5	18	0	57	0				1857
April	2015-04-15	24	2014	5	20	0	27	0				1858
April	2015-04-15	32	2014	5	12	0	76	0				1859
April	2015-04-15	32	2014	5	14	0	91	0				1860
April	2015-04-15	32	2014	5	18	0	68	0				1861
April	2015-04-15	32	2014	5	20	0	26	0				1862
April												1863
April	2015-04-17	10	2014	1	12	1	83	0.0120482				1864
April	2015-04-17	10	2014	1	14	3	97	0.0309278				1865
April	2015-04-17	10	2014	1	18	5	68	0.0735294				1866
April	2015-04-17	10	2014	1	20	0	31	0				1867
April	2015-04-17	15	2014	1	12	0	50	0				1868
April	2015-04-17	15	2014	1	14	3	96	0.03125				1869
April	2015-04-17	15	2014	1	18	6	68	0.0882353				1870
April	2015-04-17	15	2014	1	20	1	31	0.0322581				1871
April	2015-04-17	24	2014	1	12	0	52	0				1872
April	2015-04-17	24	2014	1	14	0	102	0				1873
April	2015-04-17	24	2014	1	18	0	71	0				1874
April	2015-04-17	24	2014	1	20	0	29	0				1875
April	2015-04-17	32	2014	1	12	0	70	0				1876
April	2015-04-17	32	2014	1	14	0	90	0				1877
April	2015-04-17	32	2014	1	18	0	73	0				1878
April	2015-04-17	32	2014	1	20	0	30	0				1879
April	2015-04-17	10	2014	2	12	0	92	0				1880
April	2015-04-17	10	2014	2	14	3	105	0.0285714				1881
April	2015-04-17	10	2014	2	18	1	68	0.0147059				1882
April	2015-04-17	10	2014	2	20	2	30	0.0666667				1883
April	2015-04-17	15	2014	2	12	0	75	0				1884
April	2015-04-17	15	2014	2	14	5	96	0.0520833				1885
April	2015-04-17	15	2014	2	18	3	71	0.0422535				1886
April	2015-04-17	15	2014	2	20	0	39	0				1887
April	2015-04-17	24	2014	2	12	0	80	0				1888
April	2015-04-17	24	2014	2	14	0	103	0				1889
April	2015-04-17	24	2014	2	18	0	66	0				1890
April	2015-04-17	24	2014	2	20	0	29	0				1891
April	2015-04-17	32	2014	2	12	0	64	0				1892
April	2015-04-17	32	2014	2	14	0	90	0				1893
April	2015-04-17	32	2014	2	18	0	65	0				1894
April	2015-04-17	32	2014	2	20	0	26	0				1895
April	2015-04-17	10	2014	3	12	0	75	0				1896
April	2015-04-17	10	2014	3	14	4	107	0.0373832				1897
April	2015-04-17	10	2014	3	18	2	72	0.0277778				1898
April	2015-04-17	10	2014	3	20	0	29	0				1899
April	2015-04-17	15	2014	3	12	0	84	0				1900
April	2015-04-17	15	2014	3	14	3	102	0.0294118				1901
April	2015-04-17	15	2014	3	18	1	62	0.016129				1902
April	2015-04-17	15	2014	3	20	0	28	0				1903
April	2015-04-17	24	2014	3	12	0	80	0				1904
April	2015-04-17	24	2014	3	14	0	111	0				1905
April	2015-04-17	24	2014	3	18	0	60	0				1906
April	2015-04-17	24	2014	3	20	0	29	0				1907
April	2015-04-17	32	2014	3	12	0	50	0				1908
April	2015-04-17	32	2014	3	14	0	99	0				1909
April	2015-04-17	32	2014	3	18	0	68	0				1910
April	2015-04-17	32	2014	3	20	0	27	0				1911
April	2015-04-17	10	2014	4	12	0	81	0				1912
April	2015-04-17	10	2014	4	14	0	104	0				1913
April	2015-04-17	10	2014	4	18	2	62	0.0322581				1914
April	2015-04-17	10	2014	4	20	1	26	0.0384615				1915
April	2015-04-17	15	2014	4	12	0	76	0				1916
April	2015-04-17	15	2014	4	14	6	108	0.0555556				1917
April	2015-04-17	15	2014	4	18	4	66	0.0606061				1918
April	2015-04-17	15	2014	4	20	0	28	0				1919
April	2015-04-17	24	2014	4	12	1	62	0.016129				1920
April	2015-04-17	24	2014	4	14	0	106	0				1921
April	2015-04-17	24	2014	4	18	0	57	0				1922
April	2015-04-17	24	2014	4	20	0	30	0				1923
April	2015-04-17	32	2014	4	12	0	57	0				1924
April	2015-04-17	32	2014	4	14	0	98	0				1925
April	2015-04-17	32	2014	4	18	0	65	0				1926
April	2015-04-17	32	2014	4	20	0	24	0				1927
April	2015-04-17	10	2014	5	12	1	76	0.0131579				1928
April	2015-04-17	10	2014	5	14	1	89	0.011236				1929
April	2015-04-17	10	2014	5	18	2	69	0.0289855				1930
April	2015-04-17	10	2014	5	20	1	27	0.037037				1931
April	2015-04-17	15	2014	5	12	0	77	0				1932
April	2015-04-17	15	2014	5	14	8	99	0.0808081				1933
April	2015-04-17	15	2014	5	18	2	67	0.0298507				1934
April	2015-04-17	15	2014	5	20	1	24	0.0416667				1935
April	2015-04-17	24	2014	5	12	0	63	0				1936
April	2015-04-17	24	2014	5	14	0	101	0				1937
April	2015-04-17	24	2014	5	18	0	57	0				1938
April	2015-04-17	24	2014	5	20	0	27	0				1939
April	2015-04-17	32	2014	5	12	0	76	0				1940
April	2015-04-17	32	2014	5	14	0	91	0				1941
April	2015-04-17	32	2014	5	18	0	68	0				1942
April	2015-04-17	32	2014	5	20	0	26	0				1943
April												1944
April	2015-04-20	10	2014	1	12	0	83	0				1945
April	2015-04-20	10	2014	1	14	11	97	0.113402				1946
April	2015-04-20	10	2014	1	18	3	68	0.0441176				1947
April	2015-04-20	10	2014	1	20	0	31	0				1948
April	2015-04-20	15	2014	1	12	0	50	0				1949
April	2015-04-20	15	2014	1	14	6	96	0.0625				1950
April	2015-04-20	15	2014	1	18	1	68	0.0147059				1951
April	2015-04-20	15	2014	1	20	0	31	0				1952
April	2015-04-20	24	2014	1	12	0	52	0				1953
April	2015-04-20	24	2014	1	14	0	102	0				1954
April	2015-04-20	24	2014	1	18	0	71	0				1955
April	2015-04-20	24	2014	1	20	0	29	0				1956
April	2015-04-20	32	2014	1	12	0	70	0				1957
April	2015-04-20	32	2014	1	14	0	90	0				1958
April	2015-04-20	32	2014	1	18	0	73	0				1959
April	2015-04-20	32	2014	1	20	0	30	0				1960
April	2015-04-20	10	2014	2	12	2	92	0.0217391				1961
April	2015-04-20	10	2014	2	14	12	105	0.114286				1962
April	2015-04-20	10	2014	2	18	5	68	0.0735294				1963
April	2015-04-20	10	2014	2	20	0	30	0				1964
April	2015-04-20	15	2014	2	12	0	75	0				1965
April	2015-04-20	15	2014	2	14	9	96	0.09375				1966
April	2015-04-20	15	2014	2	18	2	71	0.028169				1967
April	2015-04-20	15	2014	2	20	0	39	0				1968
April	2015-04-20	24	2014	2	12	0	80	0				1969
April	2015-04-20	24	2014	2	14	0	103	0				1970
April	2015-04-20	24	2014	2	18	0	66	0				1971
April	2015-04-20	24	2014	2	20	0	29	0				1972
April	2015-04-20	32	2014	2	12	0	64	0				1973
April	2015-04-20	32	2014	2	14	0	90	0				1974
April	2015-04-20	32	2014	2	18	0	65	0				1975
April	2015-04-20	32	2014	2	20	0	26	0				1976
April	2015-04-20	10	2014	3	12	0	75	0				1977
April	2015-04-20	10	2014	3	14	13	107	0.121495				1978
April	2015-04-20	10	2014	3	18	5	72	0.0694444				1979
April	2015-04-20	10	2014	3	20	1	29	0.0344828				1980
April	2015-04-20	15	2014	3	12	0	84	0				1981
April	2015-04-20	15	2014	3	14	4	102	0.0392157				1982
April	2015-04-20	15	2014	3	18	2	62	0.0322581				1983
April	2015-04-20	15	2014	3	20	0	28	0				1984
April	2015-04-20	24	2014	3	12	0	80	0				1985
April	2015-04-20	24	2014	3	14	0	111	0				1986
April	2015-04-20	24	2014	3	18	0	60	0				1987
April	2015-04-20	24	2014	3	20	0	29	0				1988
April	2015-04-20	32	2014	3	12	0	50	0				1989
April	2015-04-20	32	2014	3	14	0	99	0				1990
April	2015-04-20	32	2014	3	18	0	68	0				1991
April	2015-04-20	32	2014	3	20	0	27	0				1992
April	2015-04-20	10	2014	4	12	0	81	0				1993
April	2015-04-20	10	2014	4	14	11	104	0.105769				1994
April	2015-04-20	10	2014	4	18	3	62	0.0483871				1995
April	2015-04-20	10	2014	4	20	2	26	0.0769231				1996
April	2015-04-20	15	2014	4	12	0	76	0				1997
April	2015-04-20	15	2014	4	14	4	108	0.037037				1998
April	2015-04-20	15	2014	4	18	1	66	0.0151515				1999
[truncated: 6,538 more rows]
